# Supplementary material for: Oxyma-B, an excellent racemization suppressor for peptide synthesis
Source: Royal Society of Chemistry journal article supplement (doi:10.1039/c4ob01612b), 2014-01-01
Supplement: c4ob01612b1.pdf [file c4ob01612b1.pdf]

## Supporting Information

# Oxyma-B, an Excellent Racemization Suppressor in Peptide Synthesis

**Yahya E. Jad,<sup>a</sup> Sherine N. Khattab,<sup>b</sup> Beatriz G. de la Torre,<sup>a,c</sup> Thavendran Govender,<sup>a</sup> Hendrik G. Kruger,<sup>a</sup> Ayman El-Faham<sup>b,d,\*</sup> and Fernando Albericio<sup>a,c,e,f,g\*</sup>**

<sup>a</sup>*Catalysis and Peptide Research Unit, School of Health Sciences, University of Kwazulu-Natal, Durban 4001, South Africa. E-mail: [albericio@irbbarcelona.org](mailto:albericio@irbbarcelona.org)*

<sup>b</sup>*Department of Chemistry, Faculty of Science, Alexandria University, P.O. Box 426, Ibrahimia, Alexandria 21321, Egypt. E-mail: [aymanel\\_faham@hotmail.com](mailto:aymanel_faham@hotmail.com)*

<sup>c</sup>*School of Chemistry, Yachay Tech, Yachay City of Knowledge, 100119-Urcuqui, Ecuador*

<sup>d</sup>*Department of Chemistry, College of Science, King Saud University, P.O. Box 2455, Riyadh 11451, Saudi Arabia*

<sup>e</sup>*School of Chemistry and Physics, University of KwaZulu-Natal, Durban 4001, South Africa*

<sup>f</sup>*Institute for Research in Biomedicine and CIBER-BBN, Barcelona 08028, Spain*

<sup>g</sup>*Department of Organic Chemistry, University of Barcelona, Barcelona 08028, Spain*

$^1\text{H}$  NMR of Oxyma-B in  $\text{CDCl}_3$

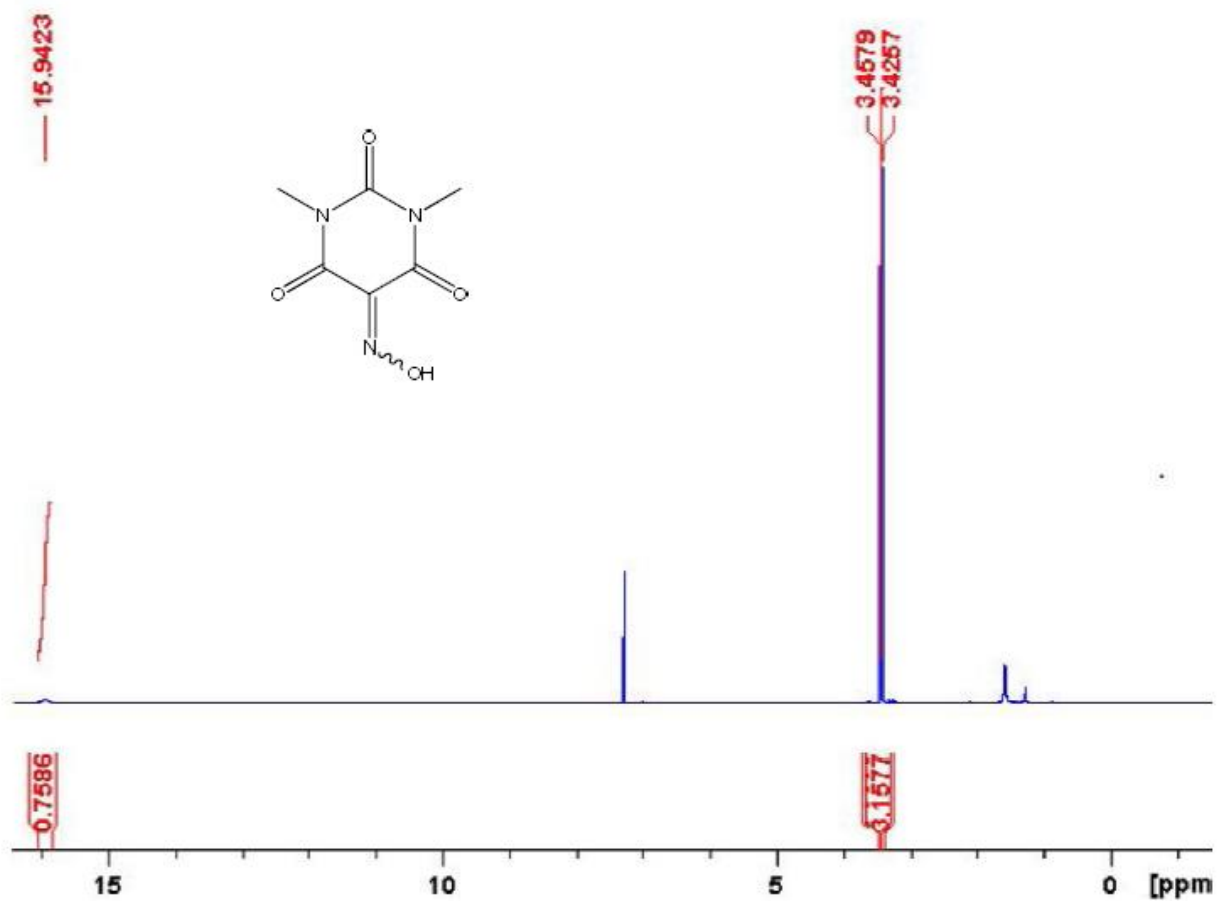

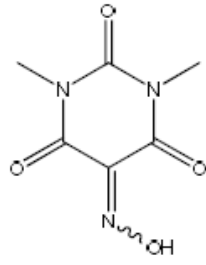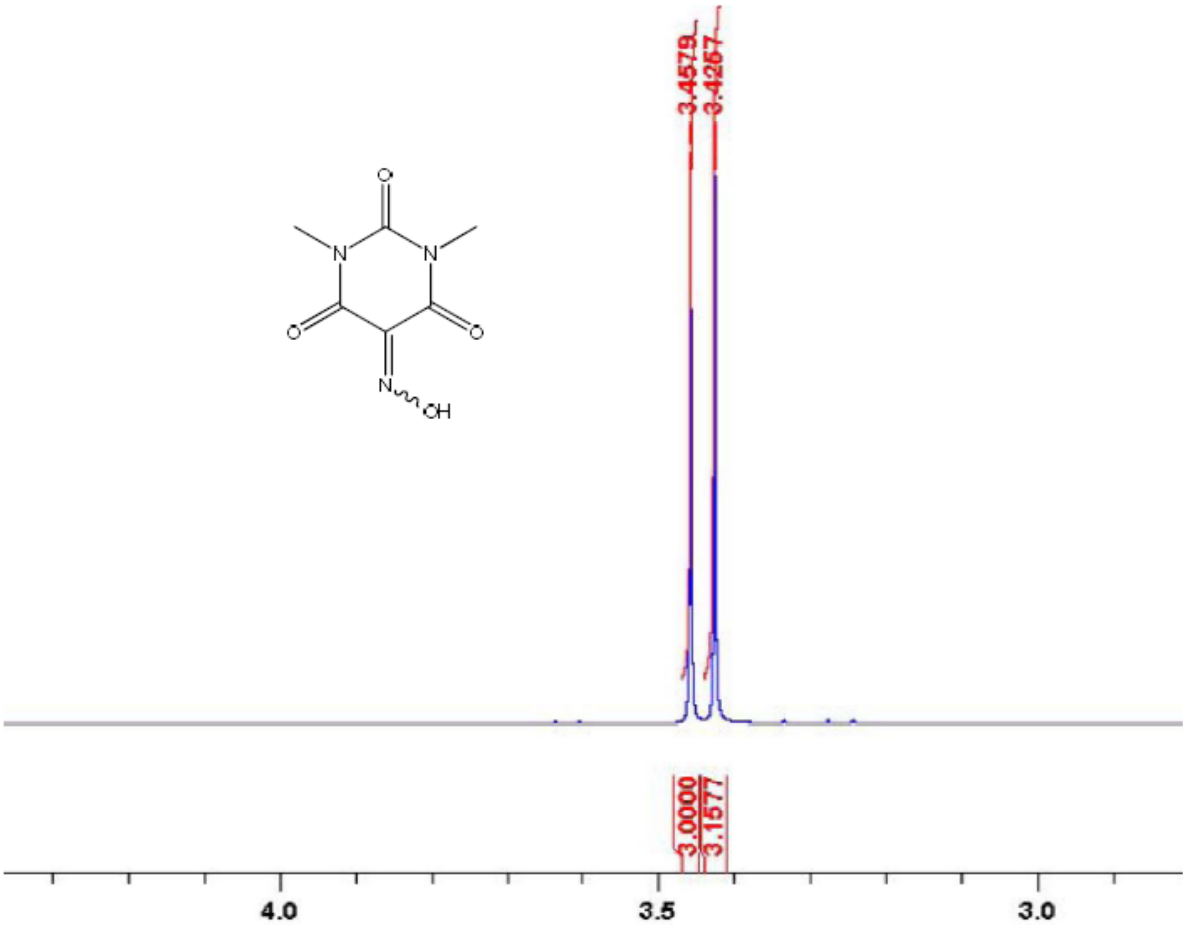

$^{13}\text{C}$  NMR of Oxyma-B in acetonitrile-d<sub>4</sub>

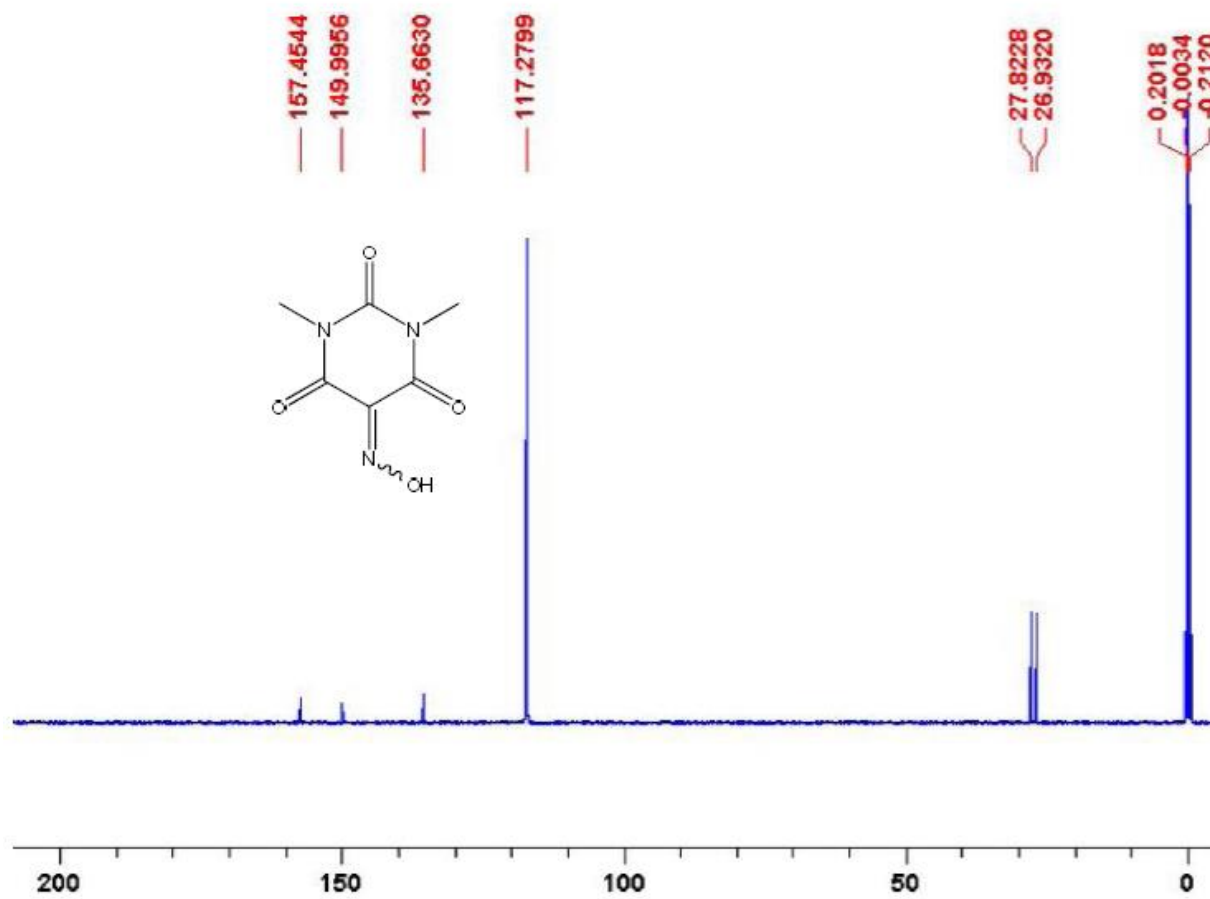

# Display Report

## Analysis Info

Analysis Name D:\Data\YAHYA\OXYMAB000002.d  
Method tune\_low.m  
Sample Name OXYMAB  
Comment

Acquisition Date 7/9/2014 11:58:47 AM

Operator BDAL@DE  
Instrument micrOTOF-Q 10139

## Acquisition Parameter

|             |         |                       |           |                  |           |
|-------------|---------|-----------------------|-----------|------------------|-----------|
| Source Type | ESI     | Ion Polarity          | Negative  | Set Nebulizer    | 0.4 Bar   |
| Focus       | Active  | Set Capillary         | 4000 V    | Set Dry Heater   | 220 °C    |
| Scan Begin  | 50 m/z  | Set End Plate Offset  | -500 V    | Set Dry Gas      | 4.0 l/min |
| Scan End    | 600 m/z | Set Collision Cell RF | 200.0 Vpp | Set Divert Valve | Source    |

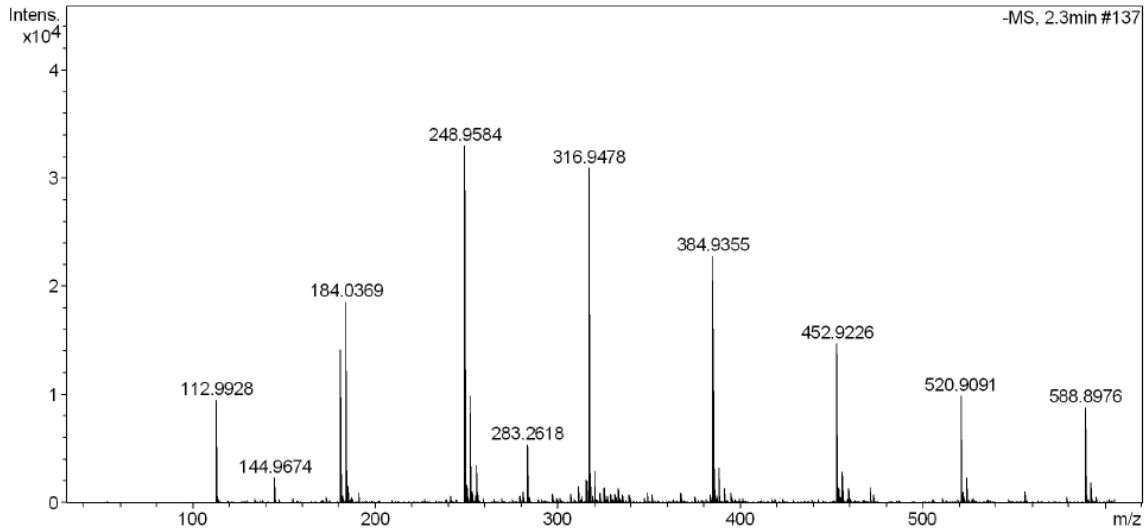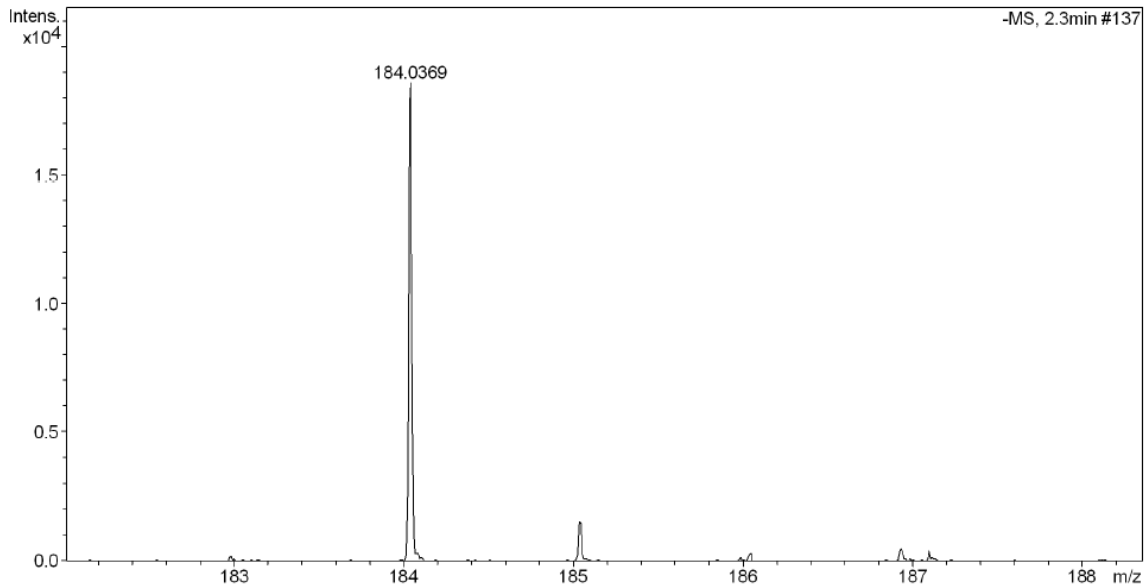

# HPLCs

## 1- Z-Phg-Pro-NH<sub>2</sub> Racemization test:

### 1.1- HOBt

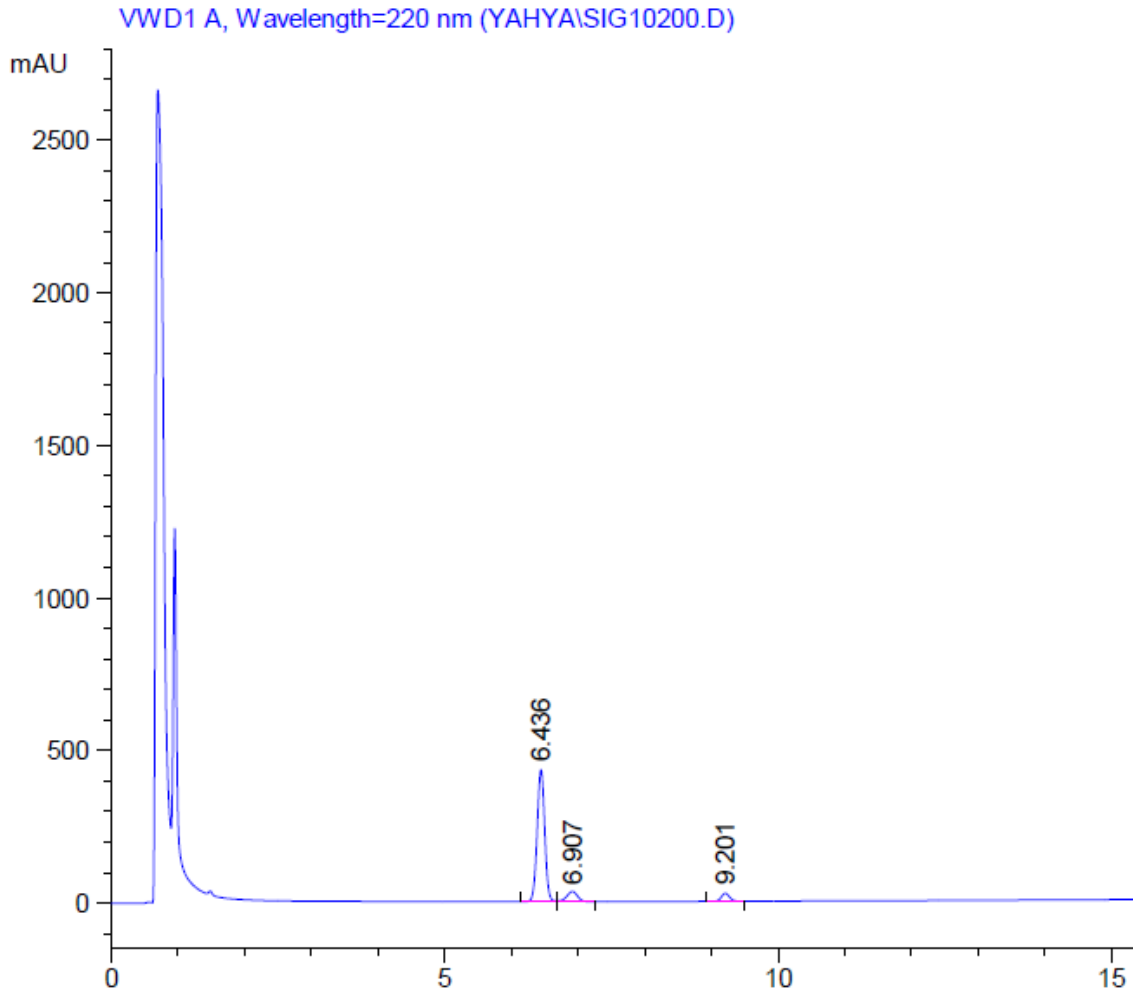

| Peak # | RetTime [min] | Type | Width [min] | Area mAU *s | Height [mAU] | Area %  |
|--------|---------------|------|-------------|-------------|--------------|---------|
| 1      | 6.436         | PV   | 0.1242      | 3414.27417  | 432.31744    | 85.0454 |
| 2      | 6.907         | VB   | 0.1751      | 375.11981   | 33.31265     | 9.3438  |
| 3      | 9.201         | BB   | 0.1312      | 225.25343   | 26.50491     | 5.6108  |

Totals : 4014.64742 492.13500

1.2-HOAt

VWD1 A, Wavelength=220 nm (YAHYA\SIG10309.D)

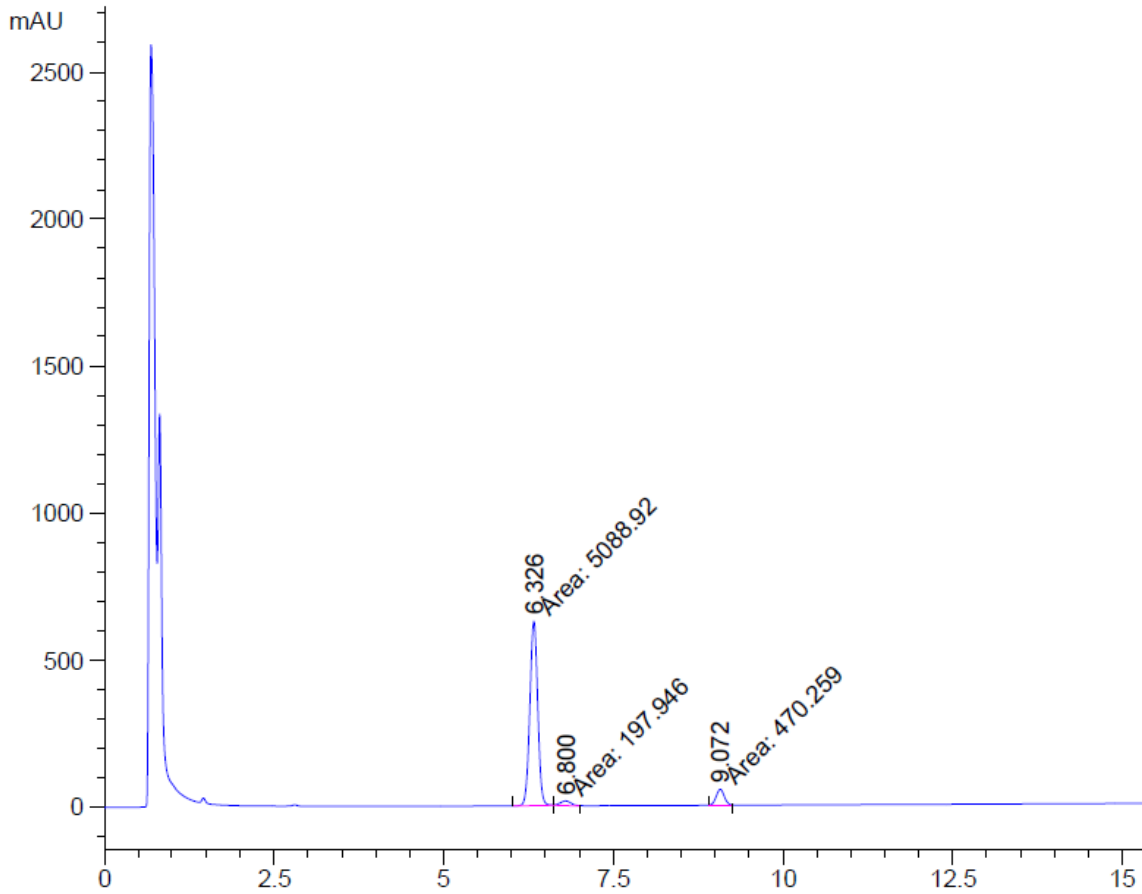

| Peak # | RetTime [min] | Type | Width [min] | Area mAU *s | Height [mAU] | Area %  |
|--------|---------------|------|-------------|-------------|--------------|---------|
| 1      | 6.326         | MM   | 0.1349      | 5088.91650  | 628.60004    | 88.3934 |
| 2      | 6.800         | MM   | 0.1974      | 197.94566   | 16.70938     | 3.4383  |
| 3      | 9.072         | MM   | 0.1427      | 470.25909   | 54.91633     | 8.1683  |

Totals : 5757.12126 700.22575

1.3-OxymaPure

VWD1 A, Wavelength=220 nm (YAHYA\SIG10942.D)

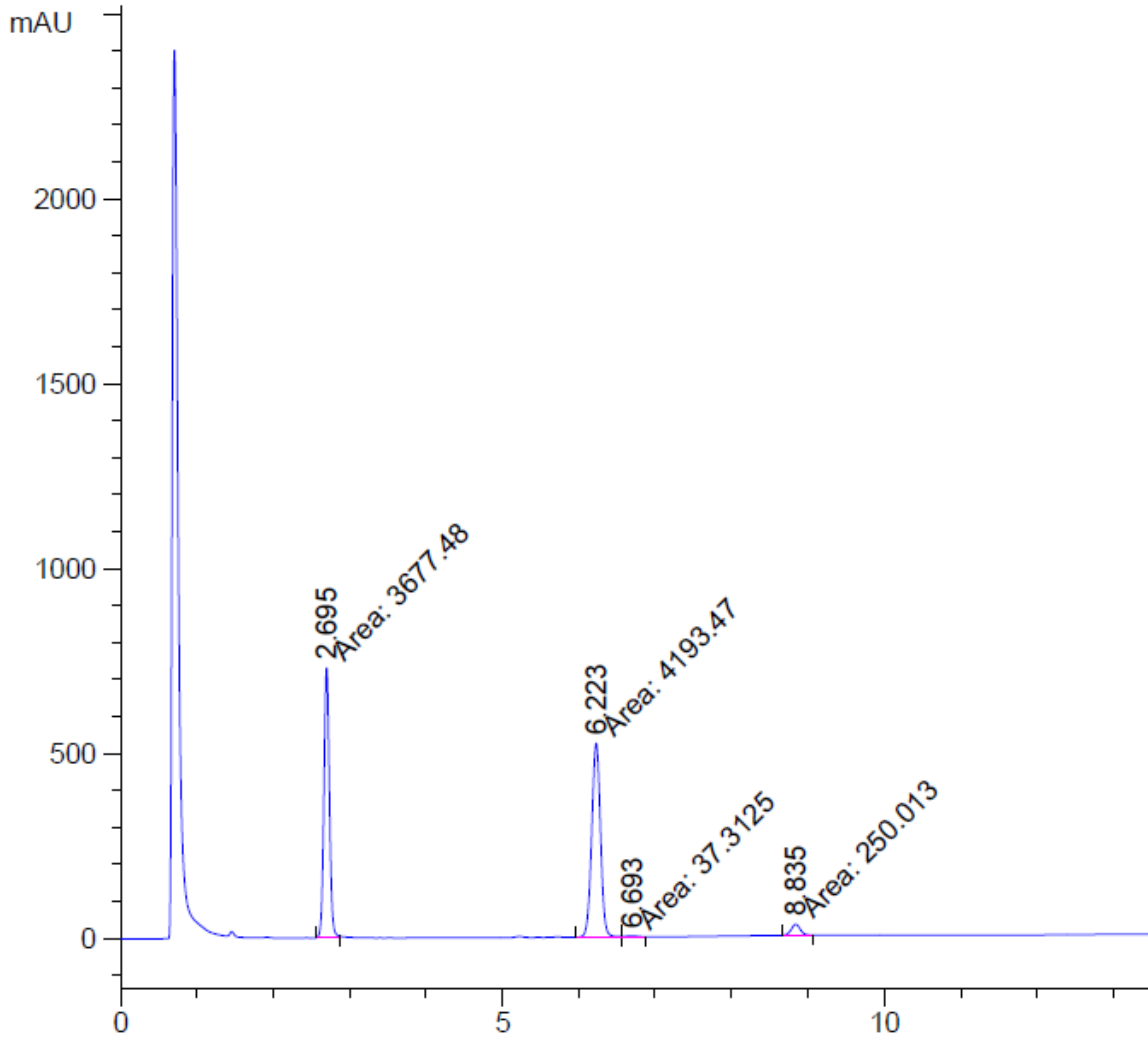

| Peak # | RetTime [min] | Type | Width [min] | Area mAU *s | Height [mAU] | Area %  |
|--------|---------------|------|-------------|-------------|--------------|---------|
| 1      | 2.695         | MM   | 0.0834      | 3677.48315  | 735.30951    | 45.0767 |
| 2      | 6.223         | MF   | 0.1329      | 4193.46582  | 525.72107    | 51.4014 |
| 3      | 6.693         | FM   | 0.2116      | 37.31252    | 2.93868      | 0.4574  |
| 4      | 8.835         | MM   | 0.1394      | 250.01295   | 29.89925     | 3.0645  |

Totals : 8158.27445 1293.86851



1.4-Oxyrna-B

VWD1 A, Wavelength=220 nm (YAHYA\SIG10198.D)

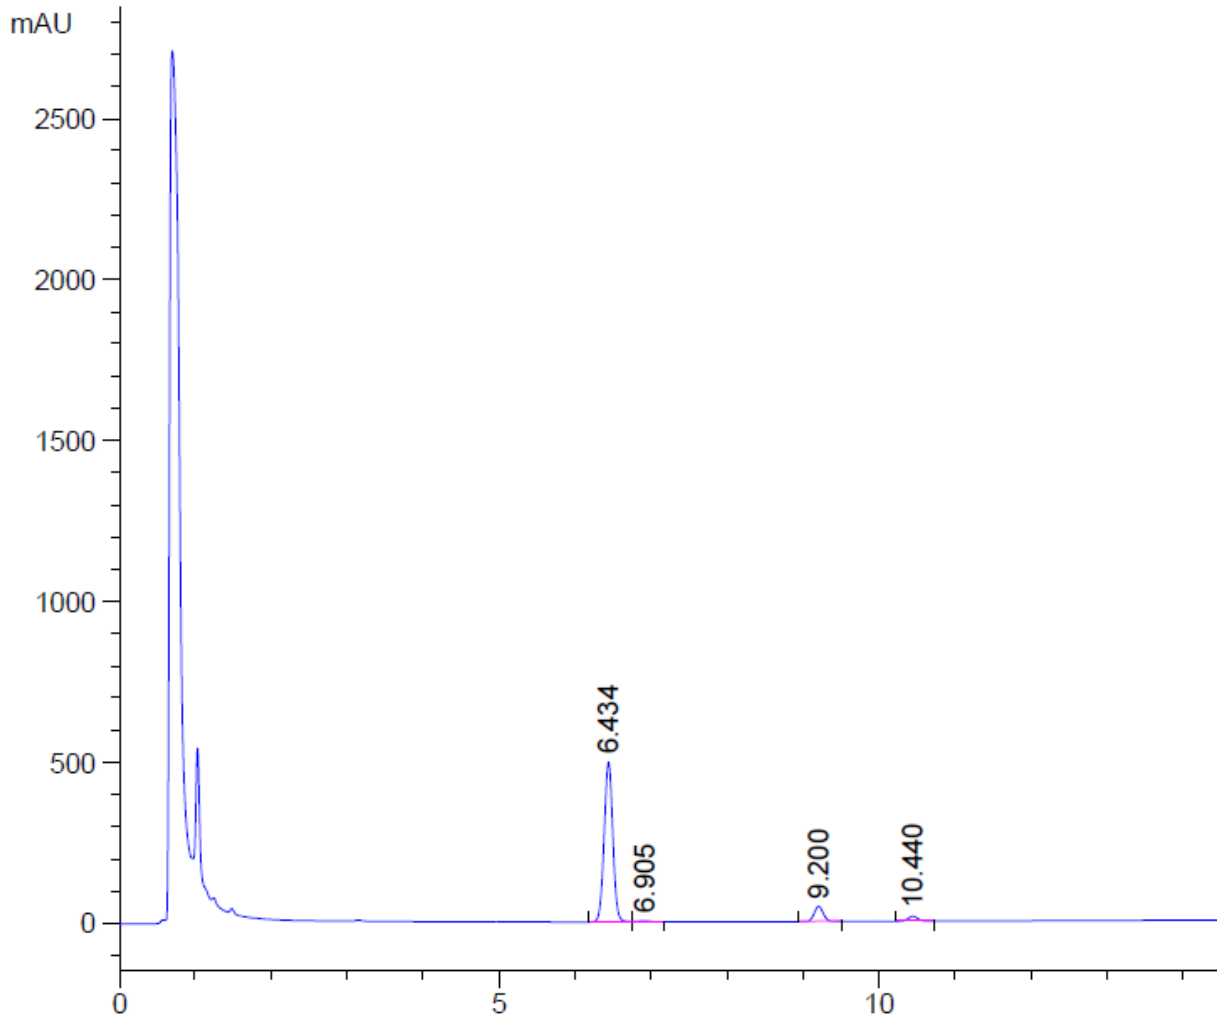

| Peak # | RetTime [min] | Type | Width [min] | Area mAU *s | Height [mAU] | Area %  |
|--------|---------------|------|-------------|-------------|--------------|---------|
| 1      | 6.434         | PV   | 0.1222      | 3953.95679  | 495.56058    | 87.3388 |
| 2      | 6.905         | VV   | 0.1890      | 40.04154    | 3.15152      | 0.8845  |
| 3      | 9.200         | BB   | 0.1298      | 394.05420   | 47.02825     | 8.7042  |
| 4      | 10.440        | BB   | 0.1418      | 139.09808   | 15.18406     | 3.0725  |

Totals : 4527.15061 560.92440

## 2-Z-Phe-Val-Pro-NH<sub>2</sub> Racemization test:

### 2.1- HOBt

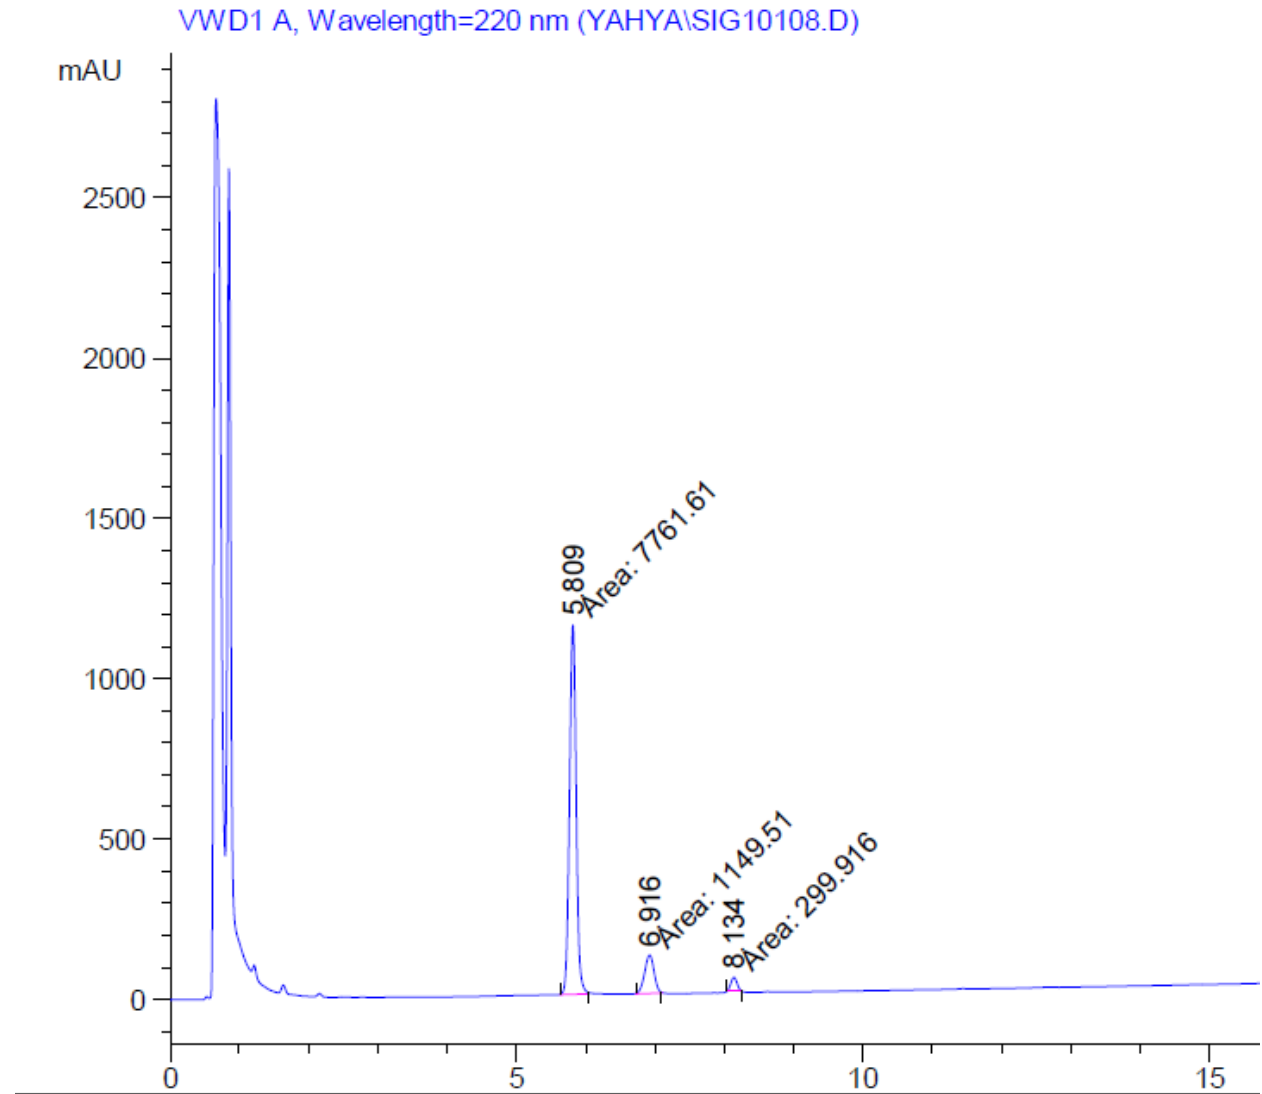

| Peak # | RetTime [min] | Type | Width [min] | Area mAU   | Area *s | Height [mAU] | Area %  |
|--------|---------------|------|-------------|------------|---------|--------------|---------|
| 1      | 5.809         | MM   | 0.1118      | 7761.60791 |         | 1156.86853   | 84.2642 |
| 2      | 6.916         | MM   | 0.1590      | 1149.51404 |         | 120.45636    | 12.4797 |
| 3      | 8.134         | MM   | 0.1096      | 299.91574  |         | 45.59239     | 3.2560  |

Totals : 9211.03769 1322.91728

2.2-HOAt

VWD1 A, Wavelength=220 nm (SUHAS\SIG10326.D)

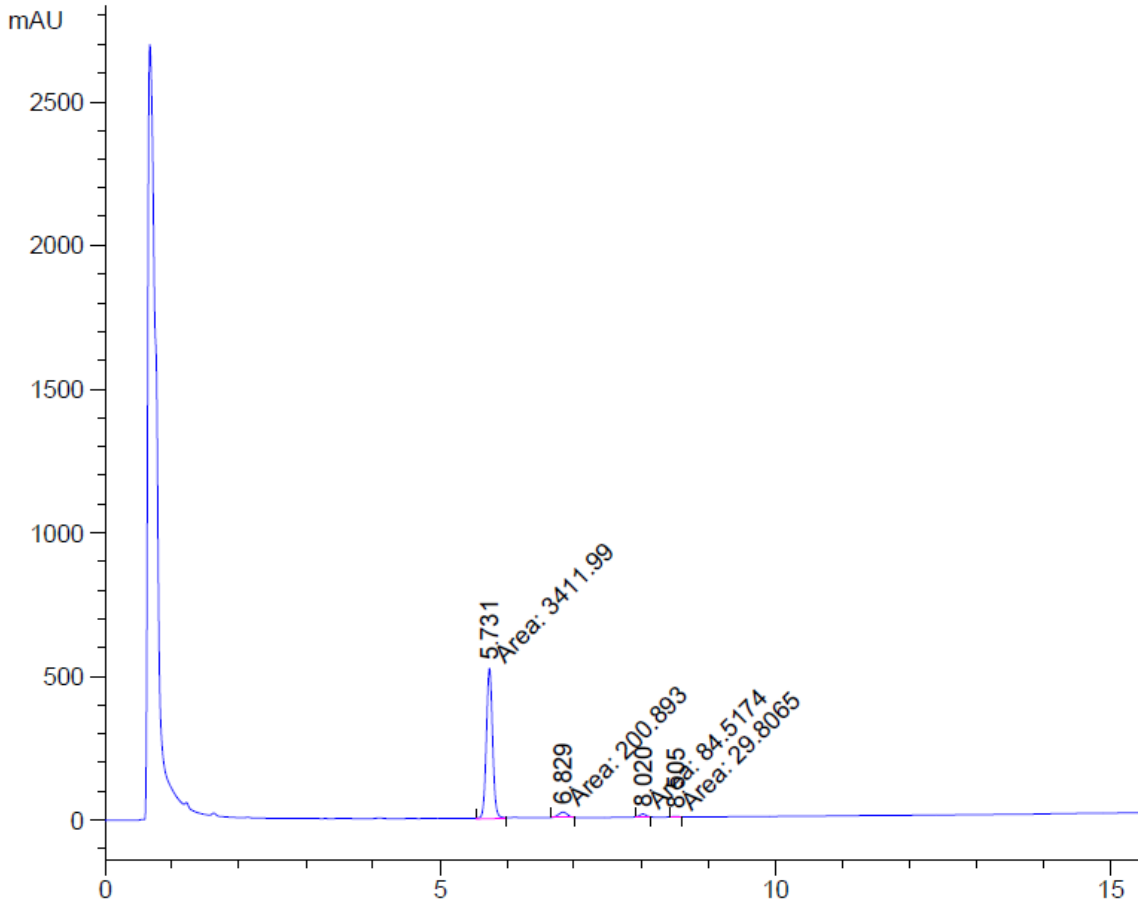

| Peak # | RetTime [min] | Type | Width [min] | Area mAU *s | Height [mAU ] | Area %  |
|--------|---------------|------|-------------|-------------|---------------|---------|
| 1      | 5.731         | MM   | 0.1082      | 3411.99072  | 525.58350     | 91.5428 |
| 2      | 6.829         | MM   | 0.1680      | 200.89302   | 19.93414      | 5.3899  |
| 3      | 8.020         | MM   | 0.1209      | 84.51738    | 11.64983      | 2.2676  |
| 4      | 8.505         | MM   | 0.1416      | 29.80651    | 3.50751       | 0.7997  |

Totals : 3727.20763 560.67498

2.3-OxyrnaPure

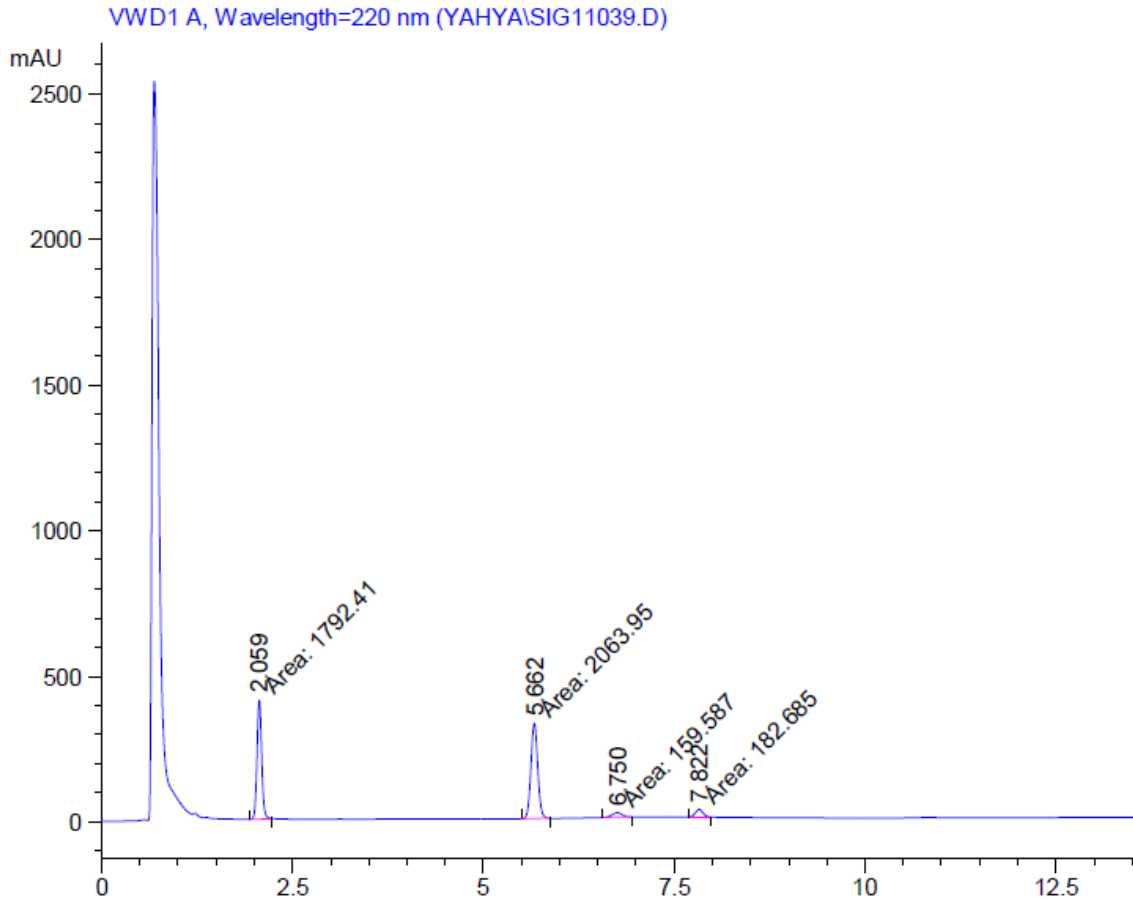

| Peak # | RetTime [min] | Type | Width [min] | Area mAU *s | Height [mAU] | Area %  |
|--------|---------------|------|-------------|-------------|--------------|---------|
| 1      | 2.059         | MM   | 0.0720      | 1792.40674  | 414.90189    | 42.6902 |
| 2      | 5.662         | MM   | 0.1045      | 2063.95459  | 329.12589    | 49.1578 |
| 3      | 6.750         | MM   | 0.1629      | 159.58696   | 16.32829     | 3.8009  |
| 4      | 7.822         | MM   | 0.1162      | 182.68468   | 26.21371     | 4.3511  |

Totals : 4198.63297 786.56978

2.4-Oxyrna-B

VWD1 A, Wavelength=220 nm (YAHYA\SIG10109.D)

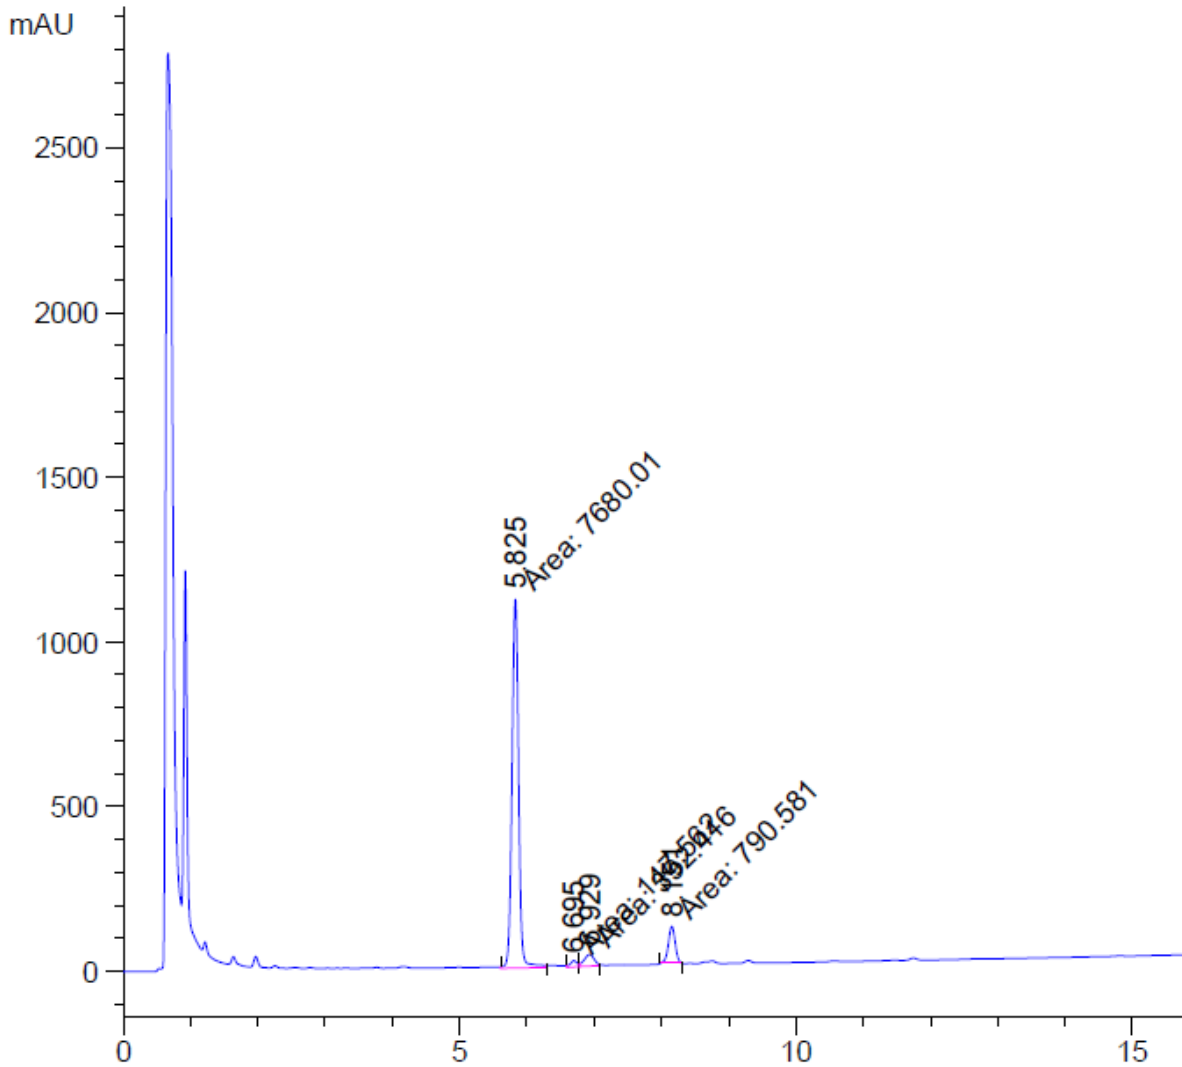

| Peak # | RetTime [min] | Type | Width [min] | Area mAU   | Area *s | Height [mAU] | Area %  |
|--------|---------------|------|-------------|------------|---------|--------------|---------|
| 1      | 5.825         | MM   | 0.1138      | 7680.01074 |         | 1124.86694   | 85.2334 |
| 2      | 6.695         | MF   | 0.1221      | 147.56154  |         | 20.13989     | 1.6376  |
| 3      | 6.929         | FM   | 0.1768      | 392.41583  |         | 36.99476     | 4.3551  |
| 4      | 8.151         | MM   | 0.1176      | 790.58063  |         | 112.03448    | 8.7739  |

Totals : 9010.56874 1294.03608

### 3- H-Gly-Ser-Phe-NH<sub>2</sub> racemization Experiments

#### 3.1-HOBt

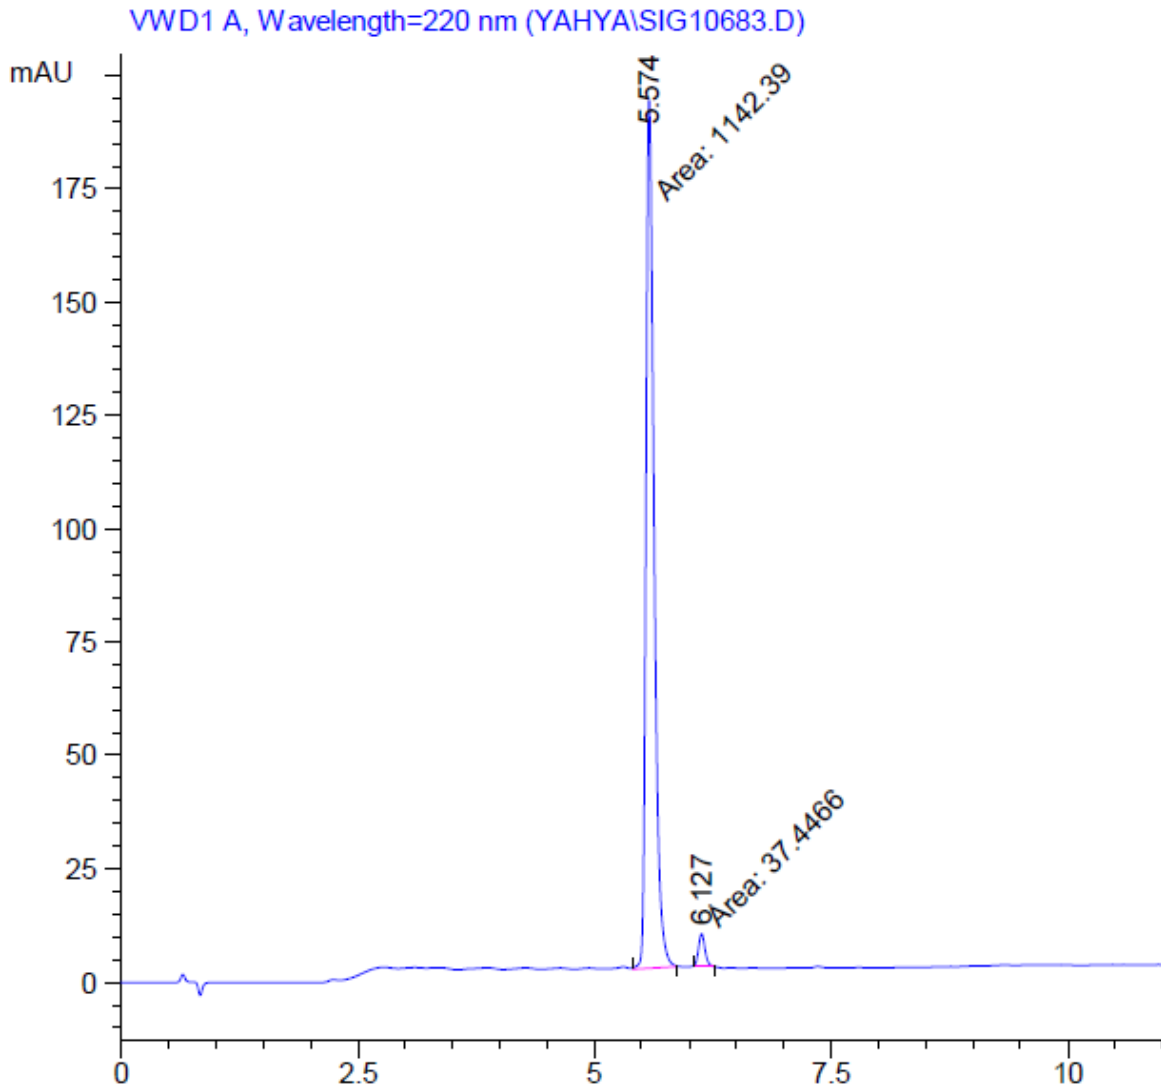

| Peak # | RetTime [min] | Type | Width [min] | Area mAU *s | Height [mAU] | Area %  |
|--------|---------------|------|-------------|-------------|--------------|---------|
| 1      | 5.574         | MM   | 0.0991      | 1142.39124  | 192.13385    | 96.8261 |
| 2      | 6.127         | MM   | 0.0834      | 37.44660    | 7.47892      | 3.1739  |

Totals : 1179.83784 199.61277

3.2-HOAt

VWD1 A, Wavelength=220 nm (YAHYA\SIG10682.D)

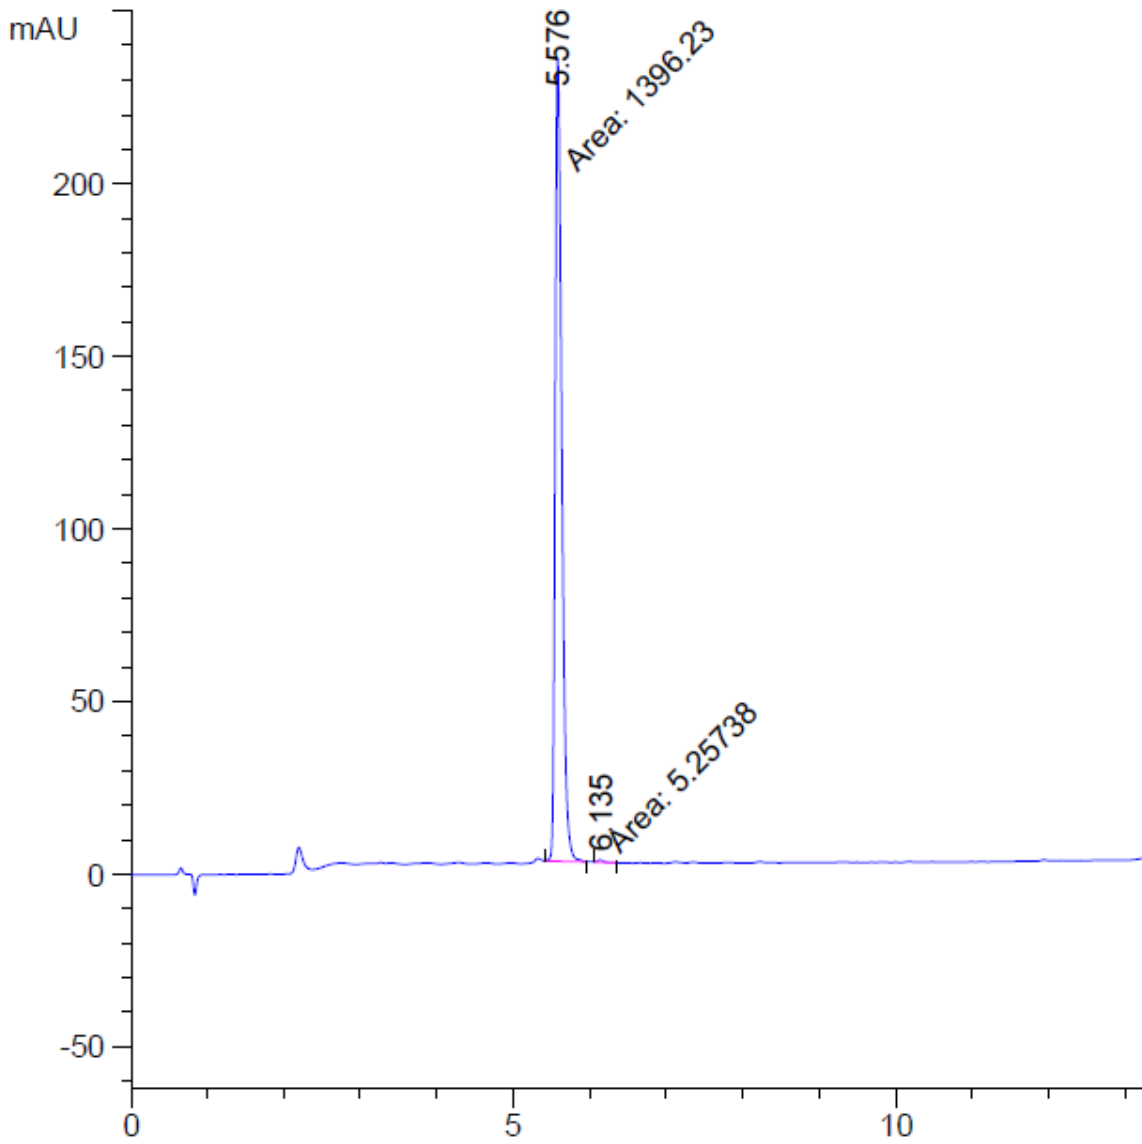

| Peak #   | RetTime [min] | Type | Width [min] | Area mAU   | Area *s | Height [mAU] | Area %  |
|----------|---------------|------|-------------|------------|---------|--------------|---------|
| 1        | 5.576         | MM   | 0.0996      | 1396.22803 |         | 233.66008    | 99.6249 |
| 2        | 6.135         | MM   | 0.1179      | 5.25738    |         | 7.43010e-1   | 0.3751  |
| Totals : |               |      |             | 1401.48541 |         | 234.40309    |         |

### 3.3-OxyrnaPure

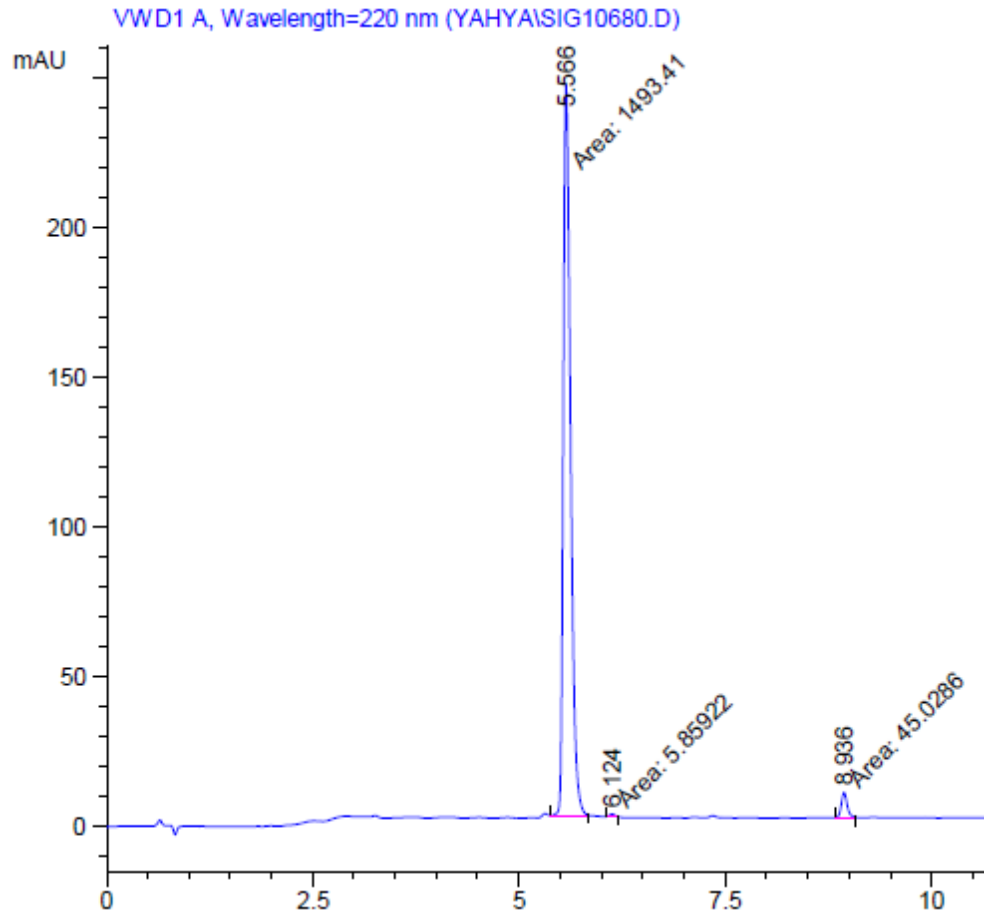

| Peak #   | RetTime [min] | Type | Width [min] | Area mAU *s | Height [mAU] | Area %  |
|----------|---------------|------|-------------|-------------|--------------|---------|
| 1        | 5.566         | MM   | 0.1013      | 1493.40833  | 245.60065    | 96.7048 |
| 2        | 6.124         | MM   | 0.0862      | 5.85922     | 1.13334      | 0.3794  |
| 3        | 8.936         | MM   | 0.0872      | 45.02864    | 8.60984      | 2.9158  |
| Totals : |               |      |             | 1544.29619  | 255.34382    |         |



3.4-Oxyrna-B

VWD1 A, Wavelength=220 nm (YAHYA\SIG10678.D)

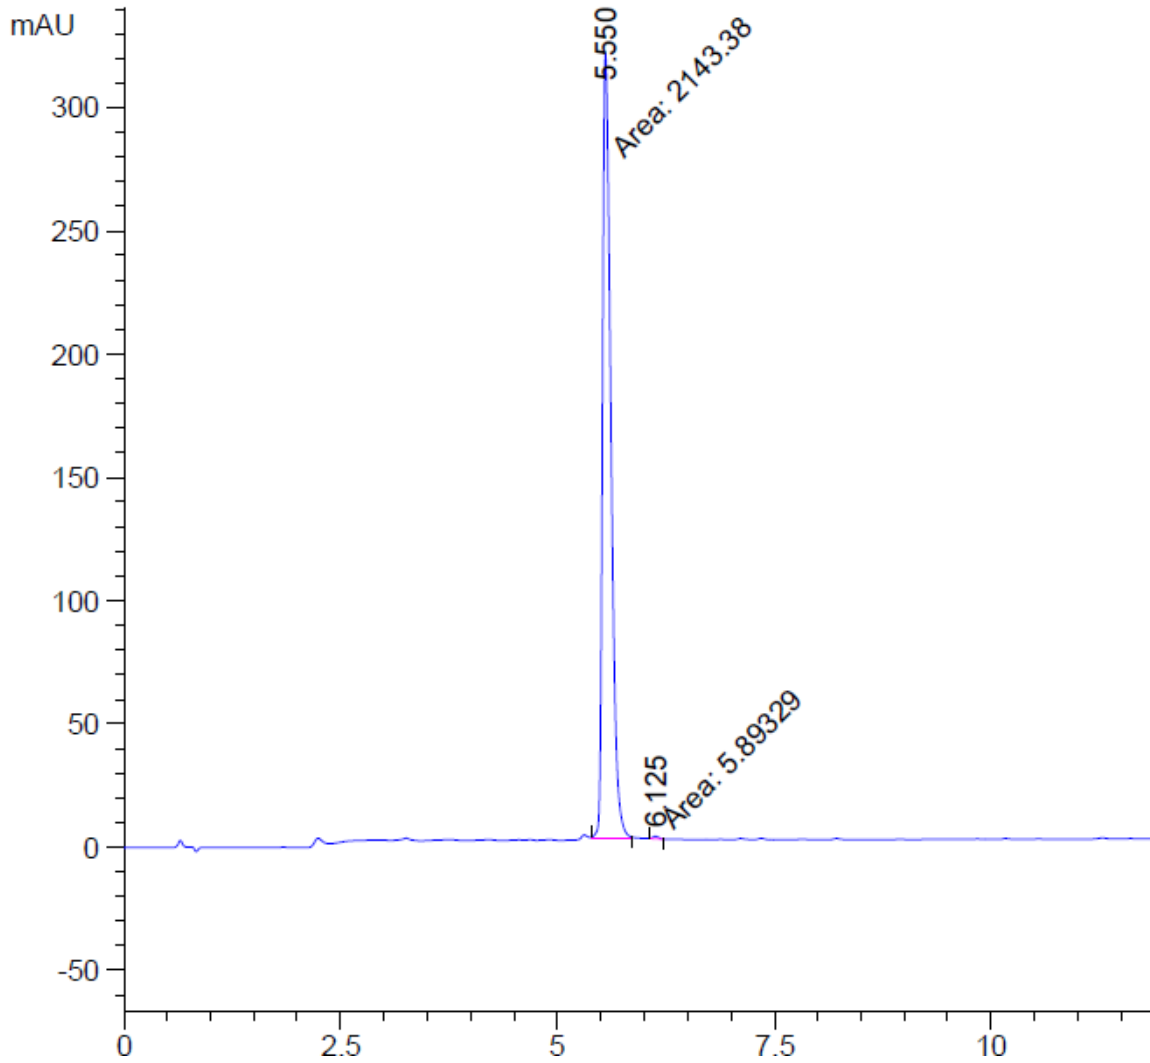

| Peak #   | RetTime [min] | Type | Width [min] | Area mAU   | Height [mAU] | Area %  |
|----------|---------------|------|-------------|------------|--------------|---------|
| 1        | 5.550         | MM   | 0.1119      | 2143.38477 | 319.10770    | 99.7258 |
| 2        | 6.125         | MM   | 0.0873      | 5.89329    | 1.12541      | 0.2742  |
| Totals : |               |      |             | 2149.27806 | 320.23311    |         |

# 4- H-Gly-Cys-Phe-NH<sub>2</sub> racemization experiments

## 4.1-HOBt

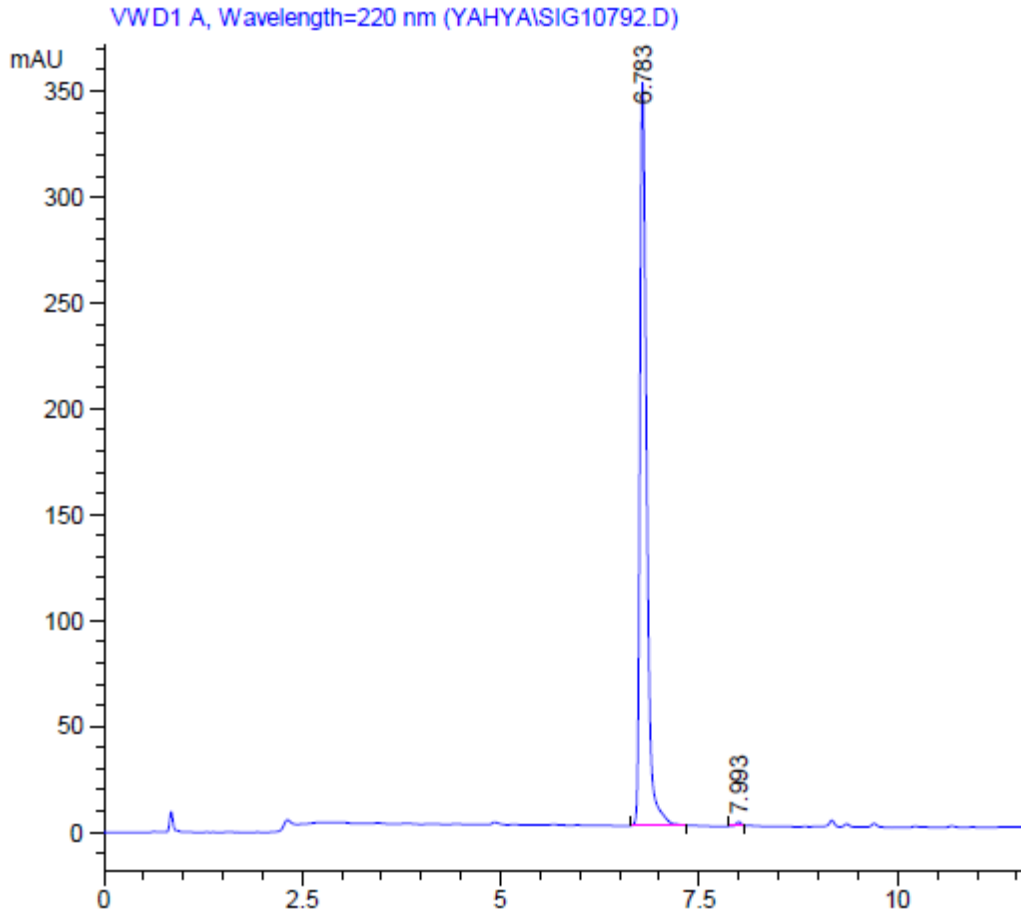

| Peak #   | RetTime [min] | Type | Width [min] | Area mAU *s | Height [mAU] | Area %  |
|----------|---------------|------|-------------|-------------|--------------|---------|
| 1        | 6.783         | BB   | 0.0929      | 2083.23022  | 349.22720    | 99.5156 |
| 2        | 7.993         | PV   | 0.0744      | 10.13929    | 2.07863      | 0.4844  |
| Totals : |               |      |             | 2093.36952  | 351.30583    |         |

4.2-HOAt

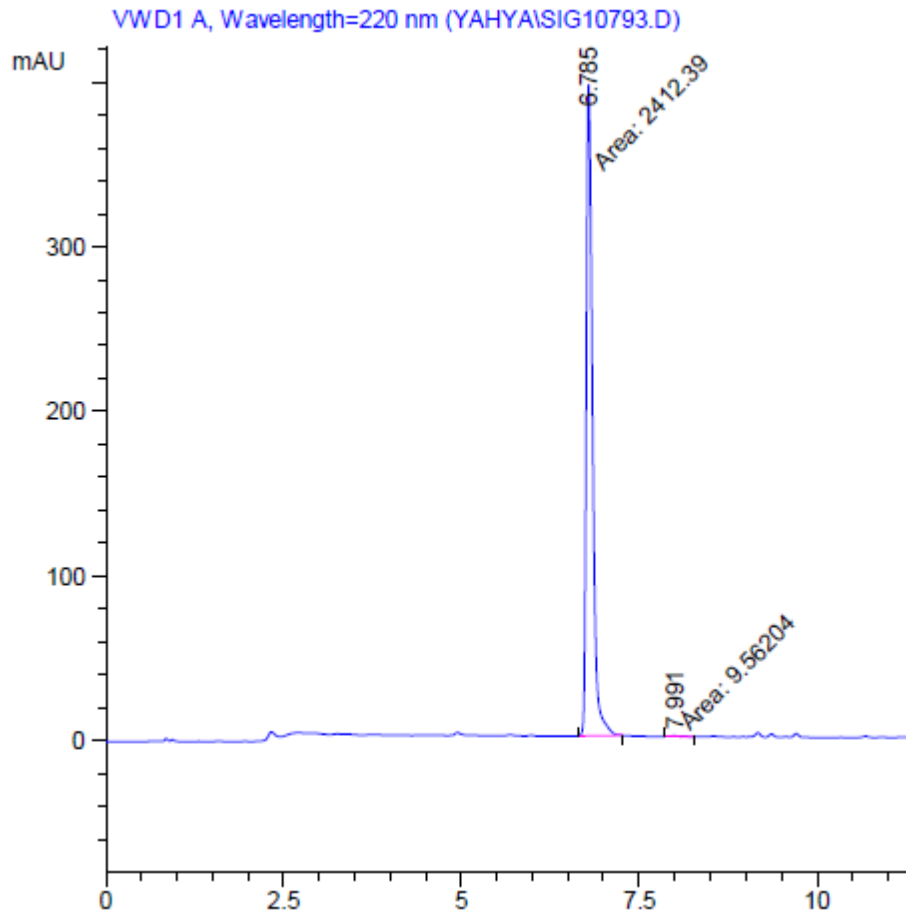

| Peak #   | RetTime [min] | Type | Width [min] | Area mAU *s | Height [mAU] | Area %  |
|----------|---------------|------|-------------|-------------|--------------|---------|
| 1        | 6.785         | MM   | 0.1015      | 2412.39185  | 396.08578    | 99.6052 |
| 2        | 7.991         | MM   | 0.2397      | 9.56204     | 6.64877e-1   | 0.3948  |
| Totals : |               |      |             | 2421.95389  | 396.75066    |         |

### 4.3-Oxympure

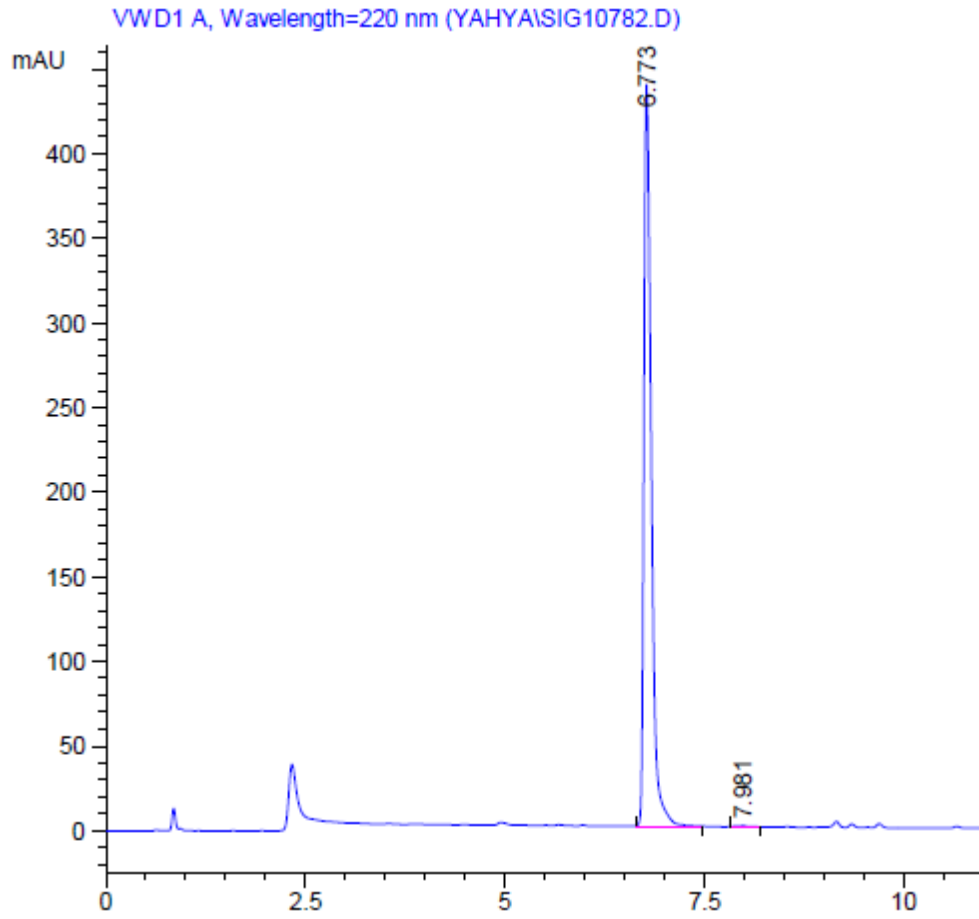

| Peak #   | RetTime [min] | Type | Width [min] | Area mAU *s | Height [mAU] | Area %  |
|----------|---------------|------|-------------|-------------|--------------|---------|
| 1        | 6.773         | BB   | 0.1015      | 2812.95752  | 436.01724    | 99.6684 |
| 2        | 7.981         | BB   | 0.1479      | 9.35891     | 8.37331e-1   | 0.3316  |
| Totals : |               |      |             | 2822.31643  | 436.85457    |         |

4.4-Oxyrna-B

VWD1 A, Wavelength=220 nm (YAHYASIG10781.D)

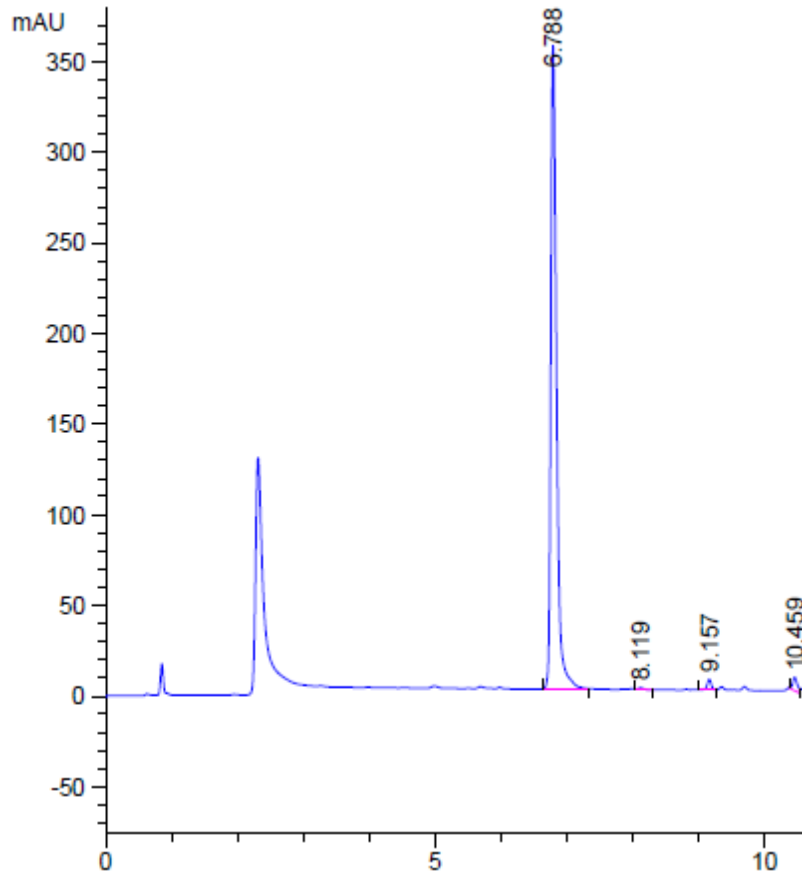

| Peak #   | RetTime [min] | Type | Width [min] | Area mAU *s | Height [mAU] | Area %  |
|----------|---------------|------|-------------|-------------|--------------|---------|
| 1        | 6.788         | BB   | 0.0939      | 2147.02563  | 354.76059    | 96.7380 |
| 2        | 8.119         | VB   | 0.0845      | 6.22254     | 1.08330      | 0.2804  |
| 3        | 9.157         | VV   | 0.0687      | 27.67116    | 5.96098      | 1.2468  |
| 4        | 10.459        | MM   | 0.0859      | 38.50278    | 7.47316      | 1.7348  |
| Totals : |               |      |             | 2219.42212  | 369.27803    |         |

# 5- H-Gly-Cys(Acm)-Phe-NH<sub>2</sub> racemization experiments

## 5.1-HOBt

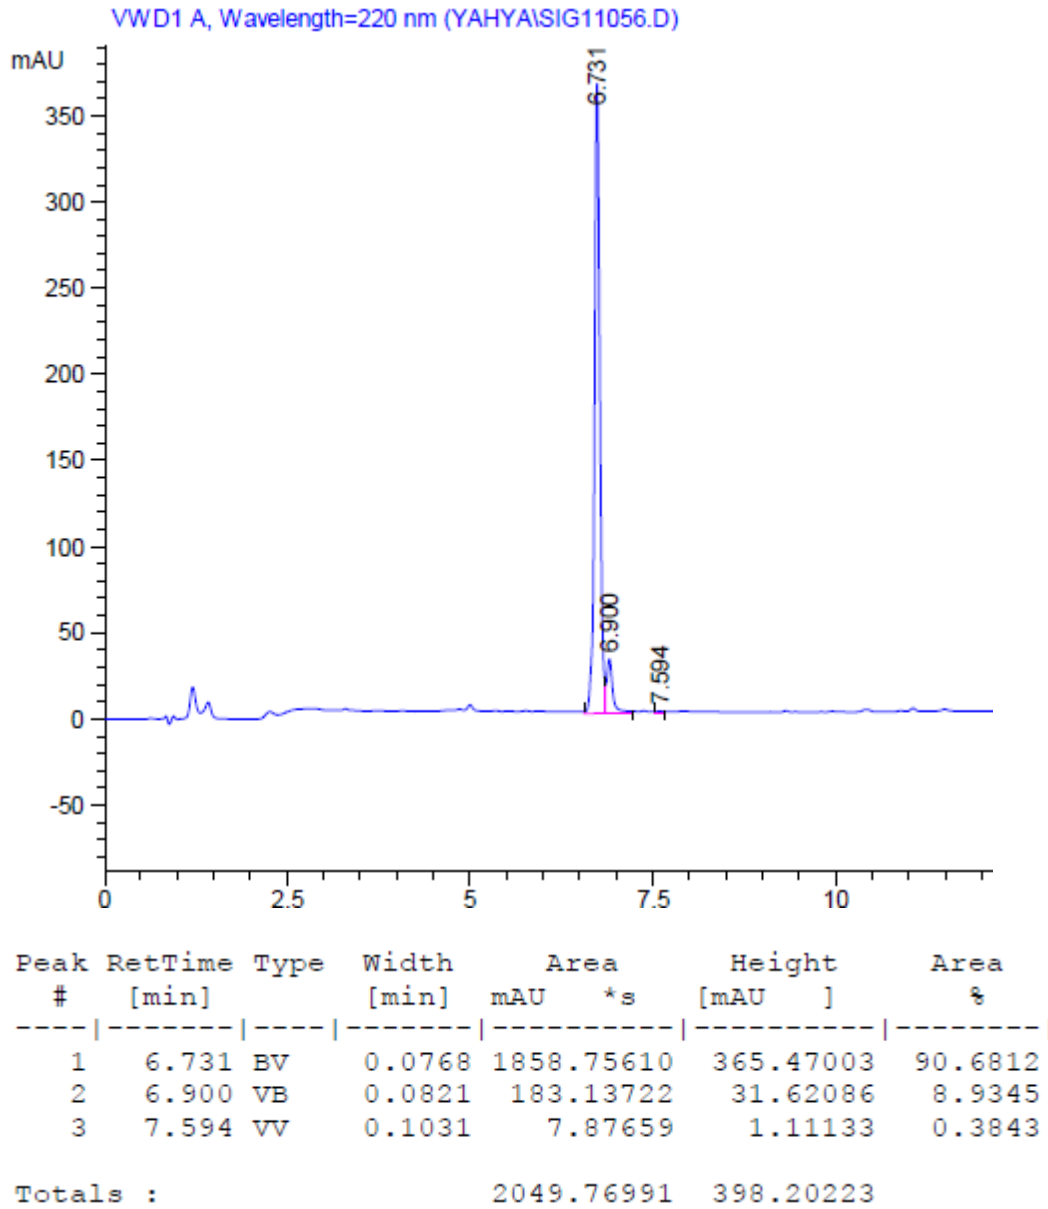

5.2-HOAt

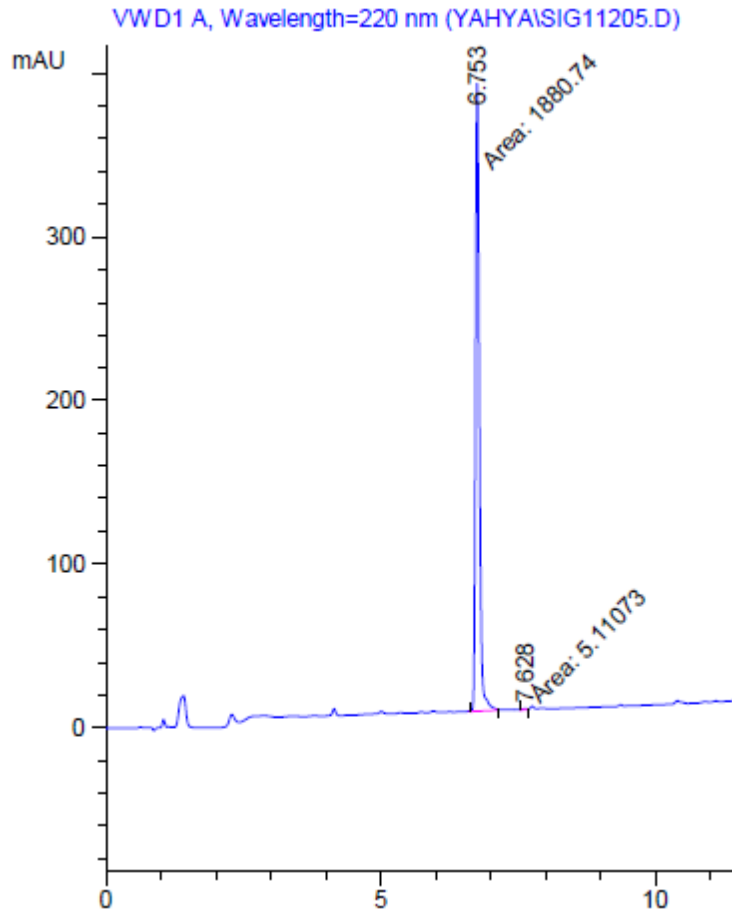

| Peak #   | RetTime [min] | Type | Width [min] | Area mAU *s | Height [mAU] | Area %  |
|----------|---------------|------|-------------|-------------|--------------|---------|
| 1        | 6.753         | MM   | 0.0812      | 1880.74109  | 385.99686    | 99.7290 |
| 2        | 7.628         | MM   | 0.1056      | 5.11073     | 8.06673e-1   | 0.2710  |
| Totals : |               |      |             | 1885.85182  | 386.80353    |         |

### 5.3-OxyrnaPure

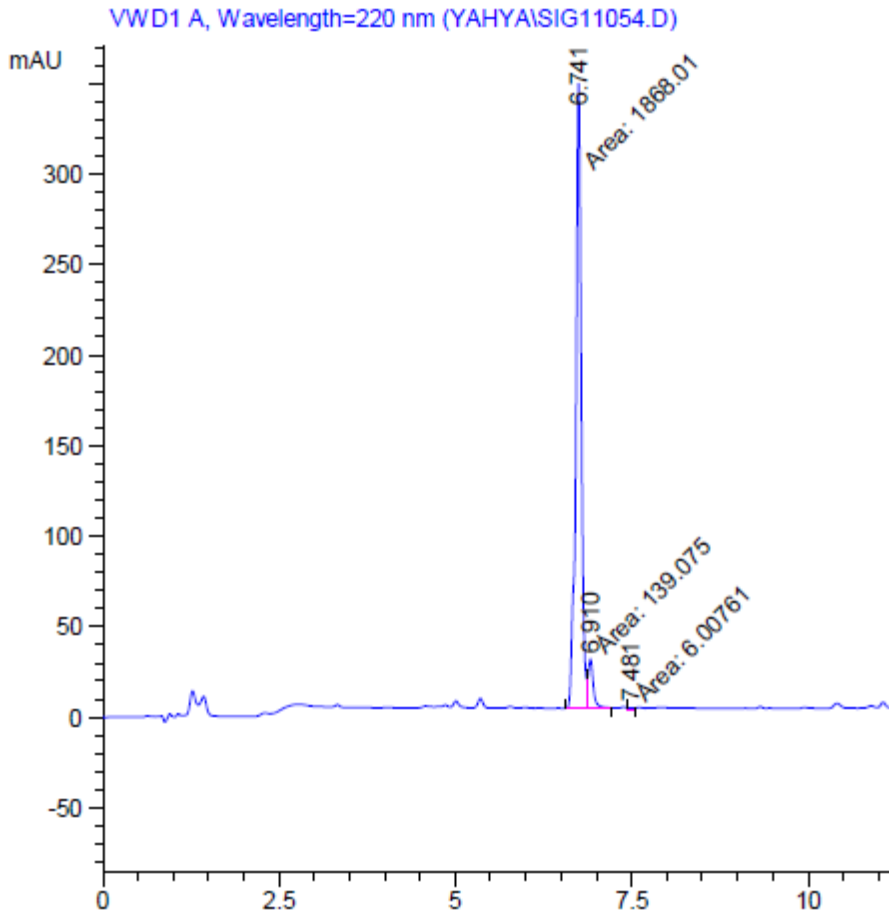

| Peak #   | RetTime [min] | Type | Width [min] | Area mAU *s | Height [mAU] | Area %  |
|----------|---------------|------|-------------|-------------|--------------|---------|
| 1        | 6.741         | MF   | 0.0900      | 1868.01404  | 345.85800    | 92.7931 |
| 2        | 6.910         | FM   | 0.0853      | 139.07504   | 27.16454     | 6.9085  |
| 3        | 7.481         | MM   | 0.0988      | 6.00761     | 1.01381      | 0.2984  |
| Totals : |               |      |             | 2013.09669  | 374.03636    |         |



5.4-Oxyrna-B

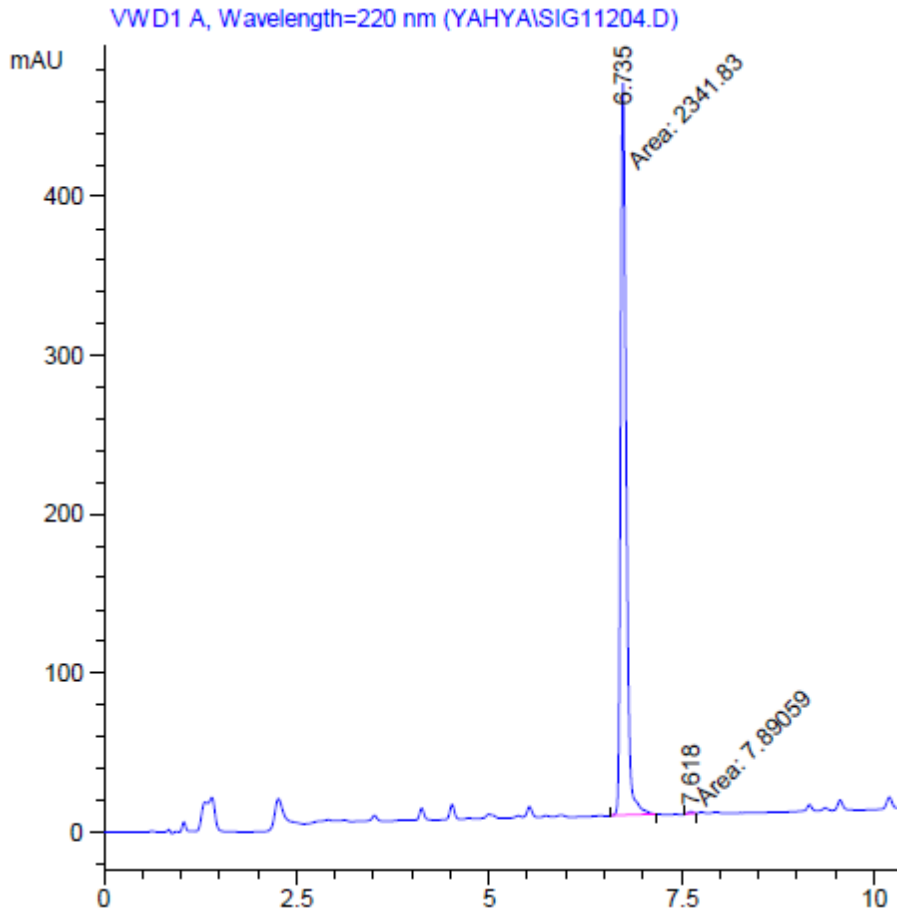

| Peak #   | RetTime [min] | Type | Width [min] | Area mAU *s | Height [mAU] | Area %  |
|----------|---------------|------|-------------|-------------|--------------|---------|
| 1        | 6.735         | MM   | 0.0841      | 2341.82642  | 464.22574    | 99.6642 |
| 2        | 7.618         | MM   | 0.0804      | 7.89059     | 1.63655      | 0.3358  |
| Totals : |               |      |             | 2349.71700  | 465.86229    |         |

## 6- H-Gly-His-Phe-NH<sub>2</sub> racemization experiments

### 6.1-HOBt

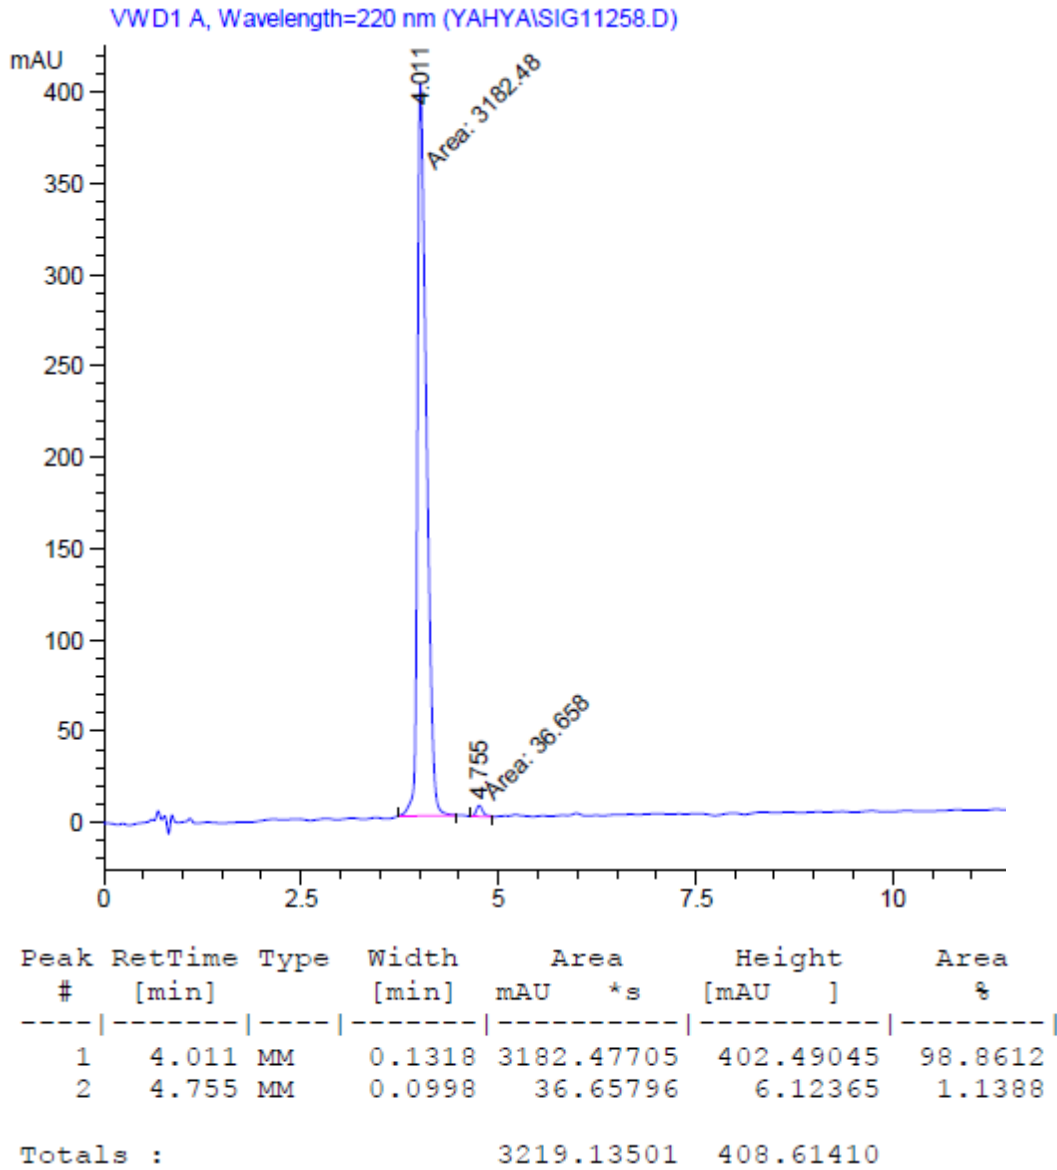

6.2-HOAt

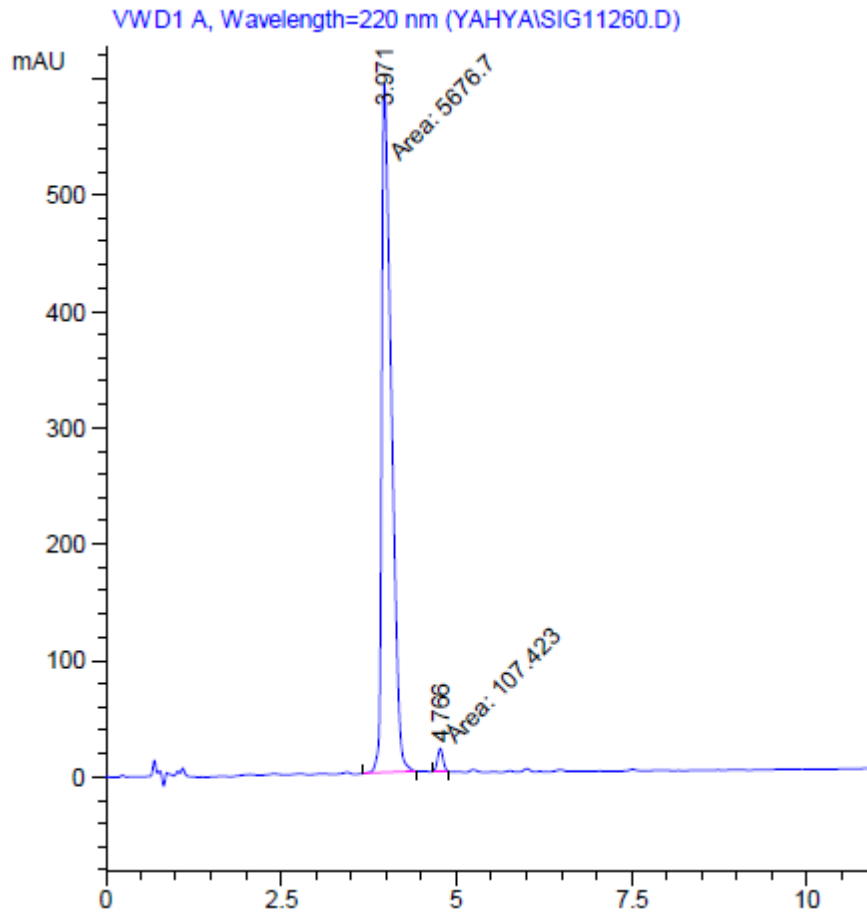

| Peak #   | RetTime [min] | Type | Width [min] | Area mAU *s | Height [mAU] | Area %  |
|----------|---------------|------|-------------|-------------|--------------|---------|
| 1        | 3.971         | MM   | 0.1595      | 5676.70312  | 593.04578    | 98.1428 |
| 2        | 4.766         | MM   | 0.0910      | 107.42307   | 19.66497     | 1.8572  |
| Totals : |               |      |             | 5784.12619  | 612.71075    |         |

### 6.3-OxyrnaPure

VWD1 A, Wavelength=220 nm (YAHYA\SIG11256.D)

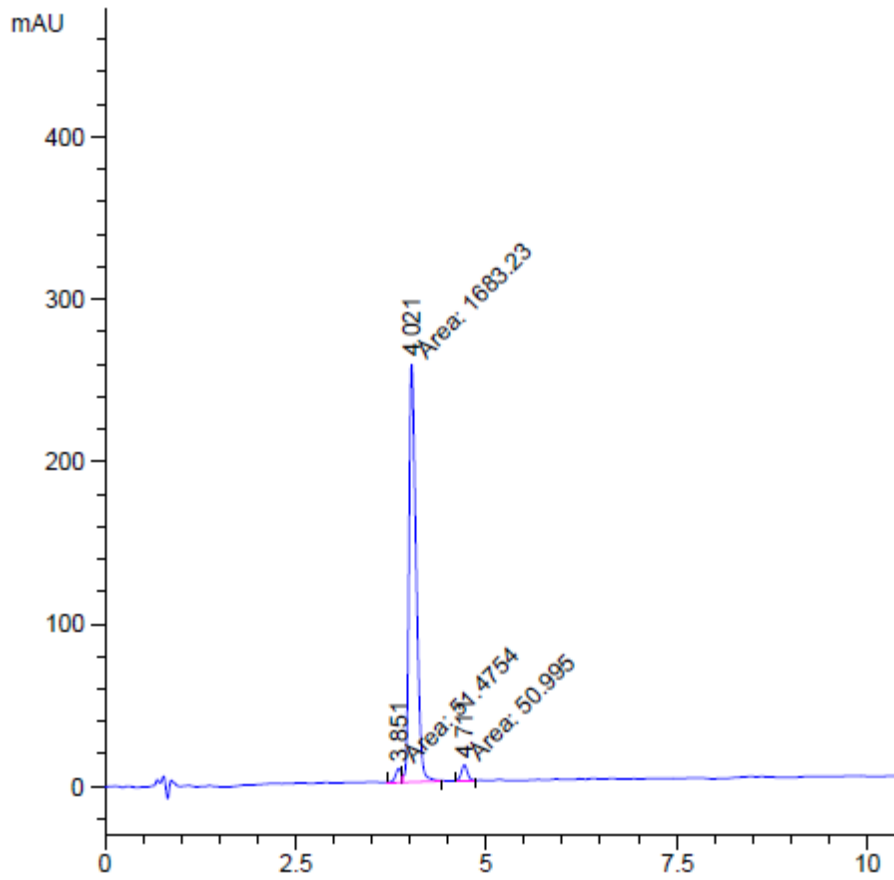

| Peak # | RetTime [min] | Type | Width [min] | Area mAU *s | Height [mAU] | Area %  |
|--------|---------------|------|-------------|-------------|--------------|---------|
| 1      | 3.851         | MF   | 0.0959      | 51.47545    | 8.94173      | 2.8827  |
| 2      | 4.021         | FM   | 0.1087      | 1683.22681  | 258.05417    | 94.2616 |
| 3      | 4.711         | MM   | 0.0897      | 50.99501    | 9.47265      | 2.8557  |

Totals : 1785.69727 276.46854

6.4-Oxyrna-B

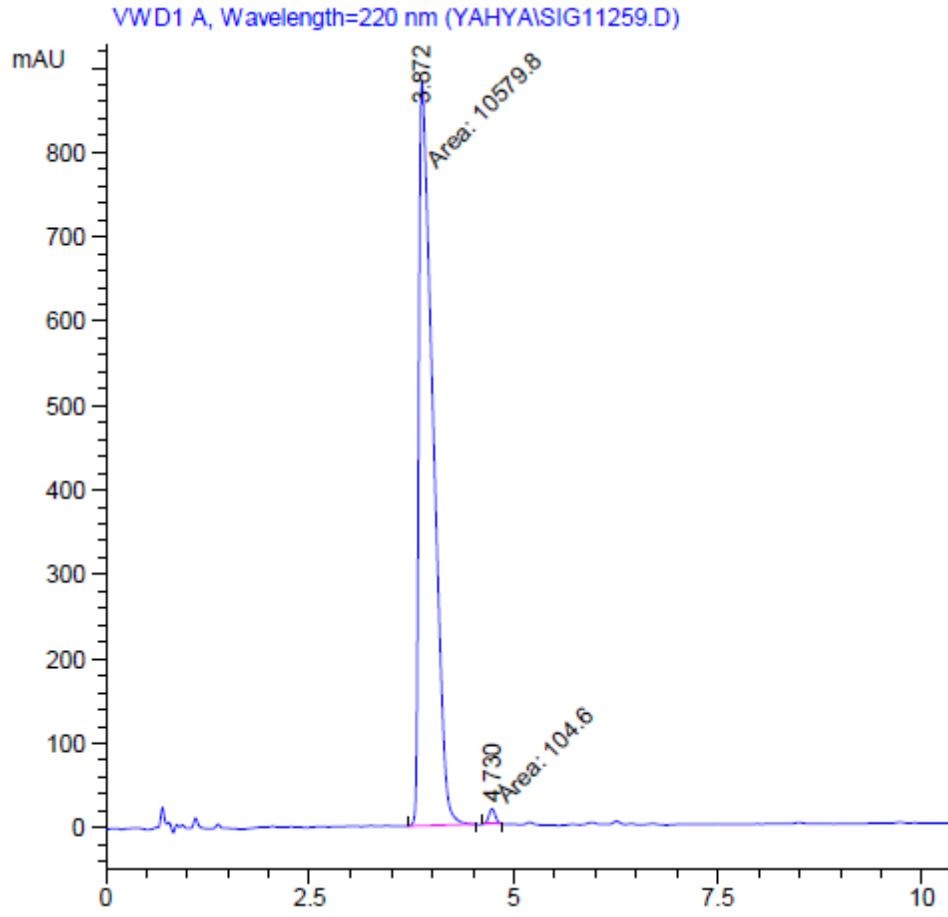

| Peak #   | RetTime [min] | Type | Width [min] | Area mAU *s | Height [mAU] | Area %  |
|----------|---------------|------|-------------|-------------|--------------|---------|
| 1        | 3.872         | MM   | 0.1996      | 1.05798e4   | 883.49829    | 99.0210 |
| 2        | 4.730         | MM   | 0.0950      | 104.59971   | 18.34989     | 0.9790  |
| Totals : |               |      |             | 1.06844e4   | 901.84818    |         |

## 7- Peptide synthesis experiments (Synthesis of H-Tyr-Aib-Aib-Phe-Leu-NH<sub>2</sub>)

### 7.1- HOBt

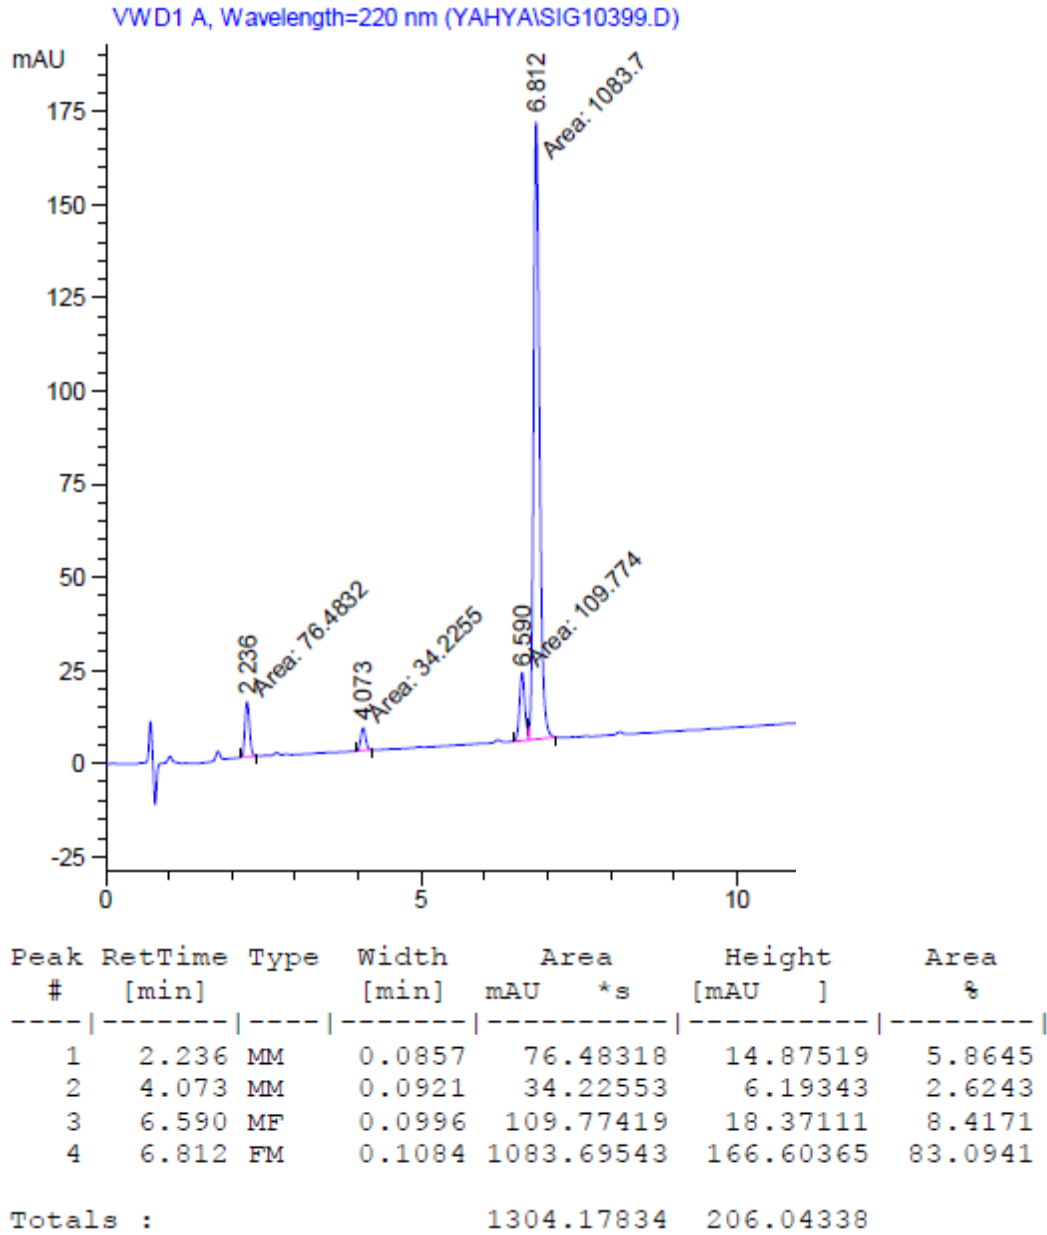

7.2- HOAt

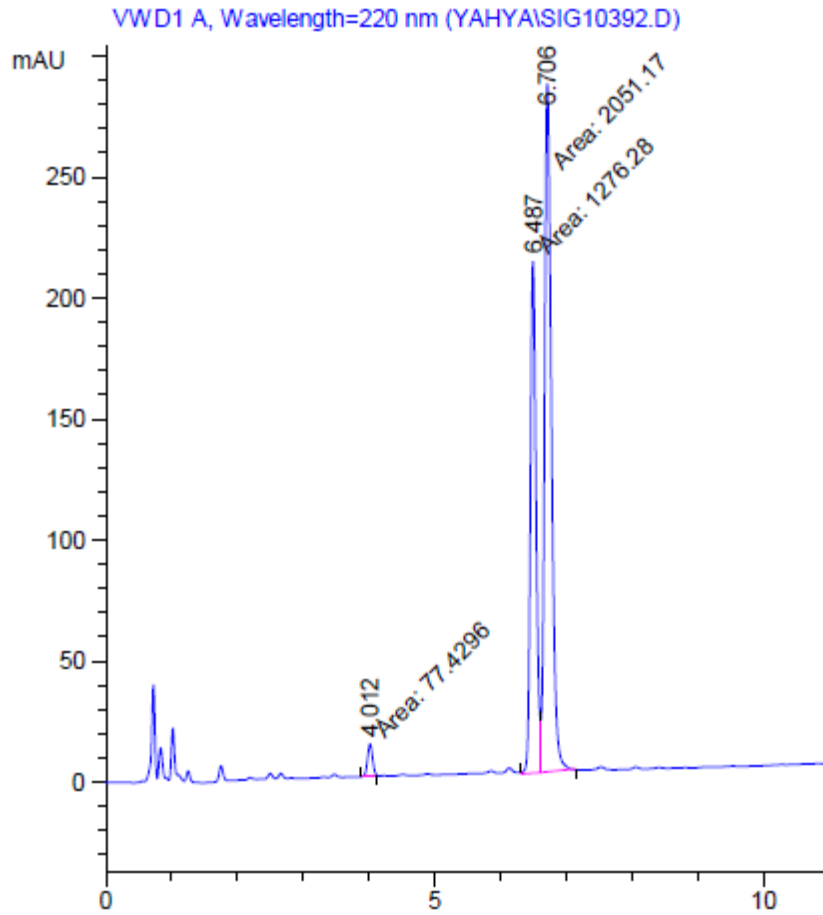

| Peak # | RetTime [min] | Type | Width [min] | Area mAU *s | Height [mAU] | Area %  |
|--------|---------------|------|-------------|-------------|--------------|---------|
| 1      | 4.012         | MM   | 0.0934      | 77.42957    | 13.81854     | 2.2741  |
| 2      | 6.487         | MF   | 0.1002      | 1276.28418  | 212.36047    | 37.4840 |
| 3      | 6.706         | FM   | 0.1197      | 2051.16602  | 285.52606    | 60.2420 |

Totals : 3404.87976 511.70508

7.3- OxymaPure

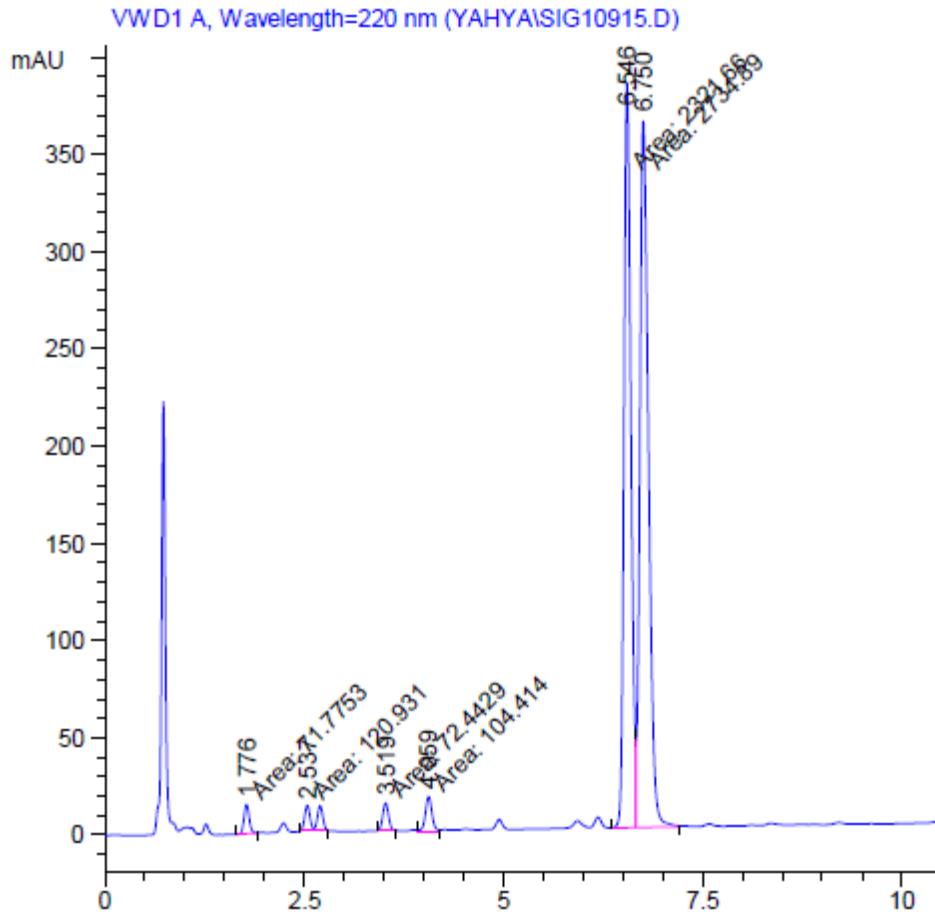

| Peak # | RetTime [min] | Type | Width [min] | Area mAU *s | Height [mAU] | Area %  |
|--------|---------------|------|-------------|-------------|--------------|---------|
| 1      | 1.776         | MM   | 0.0783      | 71.77528    | 15.27117     | 1.3228  |
| 2      | 2.537         | MM   | 0.1547      | 120.93087   | 13.02975     | 2.2287  |
| 3      | 3.519         | MM   | 0.0846      | 72.44289    | 14.27463     | 1.3351  |
| 4      | 4.059         | MM   | 0.0967      | 104.41430   | 18.00078     | 1.9243  |
| 5      | 6.546         | MF   | 0.1006      | 2321.66406  | 384.56546    | 42.7868 |
| 6      | 6.750         | FM   | 0.1250      | 2734.89282  | 364.77695    | 50.4024 |

Totals : 5426.12022 809.91874



7.4-Oxyma-B (without preactivation)

VWD1 A, Wavelength=220 nm (YAHYASIG10300.D)

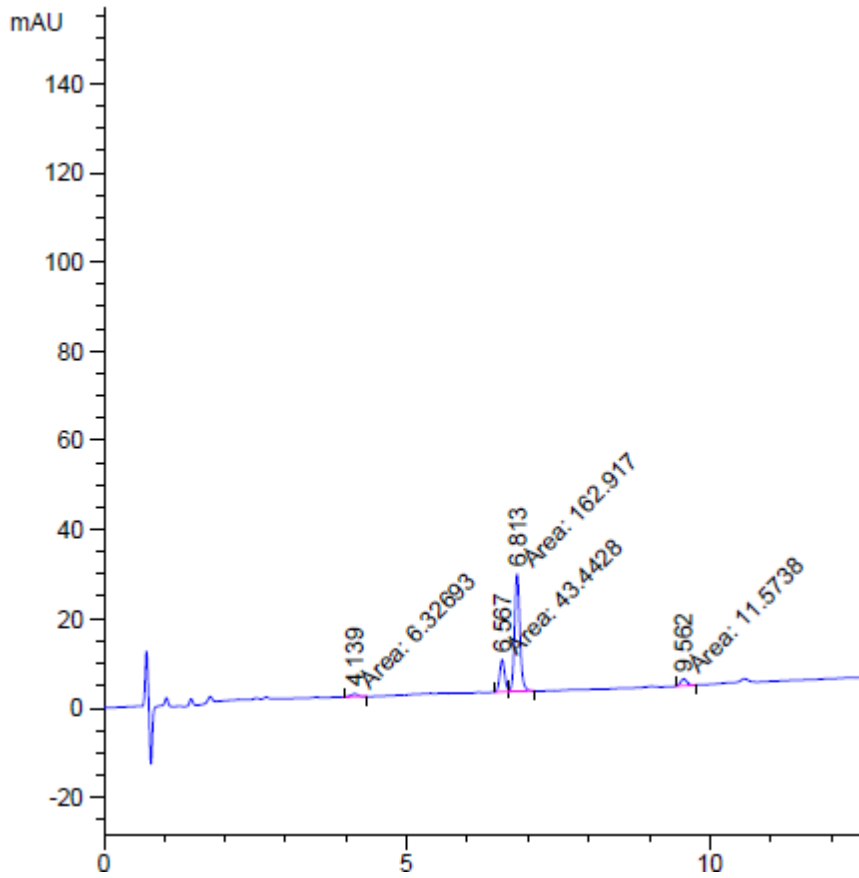

| Peak #   | RetTime [min] | Type | Width [min] | Area mAU *s | Height [mAU] | Area %  |
|----------|---------------|------|-------------|-------------|--------------|---------|
| 1        | 4.139         | MM   | 0.1475      | 6.32693     | 7.14963e-1   | 2.8212  |
| 2        | 6.567         | MF   | 0.0989      | 43.44279    | 7.32467      | 19.3715 |
| 3        | 6.813         | FM   | 0.1024      | 162.91740   | 26.51380     | 72.6464 |
| 4        | 9.562         | MM   | 0.1241      | 11.57382    | 1.55468      | 5.1609  |
| Totals : |               |      |             | 224.26094   | 36.10811     |         |

7.5-Oxyrna-B (3 min preactivation)

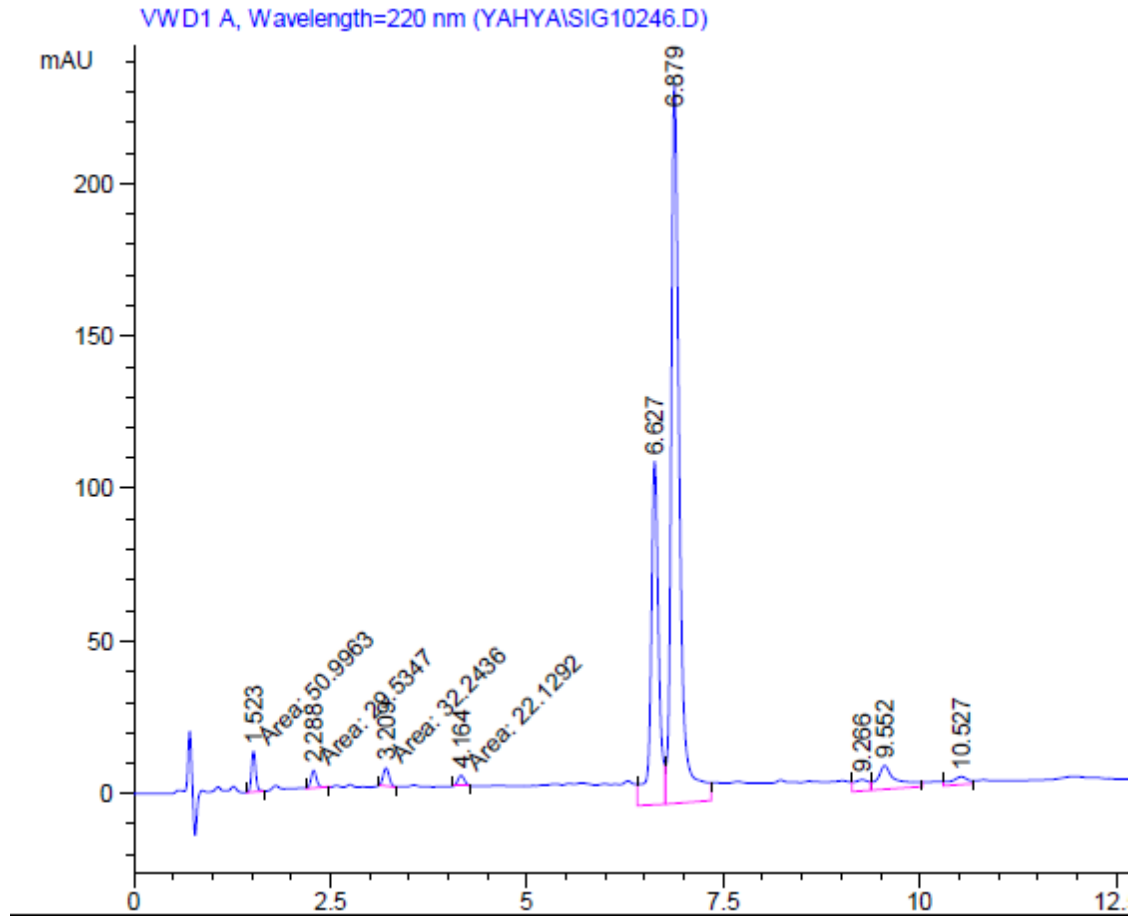

| Peak # | RetTime [min] | Type | Width [min] | Area mAU   | Area *s | Height [mAU] | Area %  |
|--------|---------------|------|-------------|------------|---------|--------------|---------|
| 1      | 1.523         | MM   | 0.0625      | 50.99629   |         | 13.59133     | 1.7591  |
| 2      | 2.288         | MM   | 0.0840      | 29.53468   |         | 5.85700      | 1.0188  |
| 3      | 3.209         | MM   | 0.0904      | 32.24356   |         | 5.94303      | 1.1122  |
| 4      | 4.164         | MM   | 0.1018      | 22.12924   |         | 3.62274      | 0.7633  |
| 5      | 6.627         | VV   | 0.1027      | 766.14014  |         | 112.55873    | 26.4279 |
| 6      | 6.879         | VB   | 0.1109      | 1771.56897 |         | 235.82402    | 61.1101 |
| 7      | 9.266         | VV   | 0.1787      | 49.47144   |         | 3.78464      | 1.7065  |
| 8      | 9.552         | VB   | 0.2309      | 137.40427  |         | 7.94631      | 4.7397  |
| 9      | 10.527        | BV   | 0.2151      | 39.49155   |         | 2.59886      | 1.3623  |

Totals : 2898.98014 391.72666

7.6-Oxyma-B (3 min preactivation with 0.1 eq. DIEA)

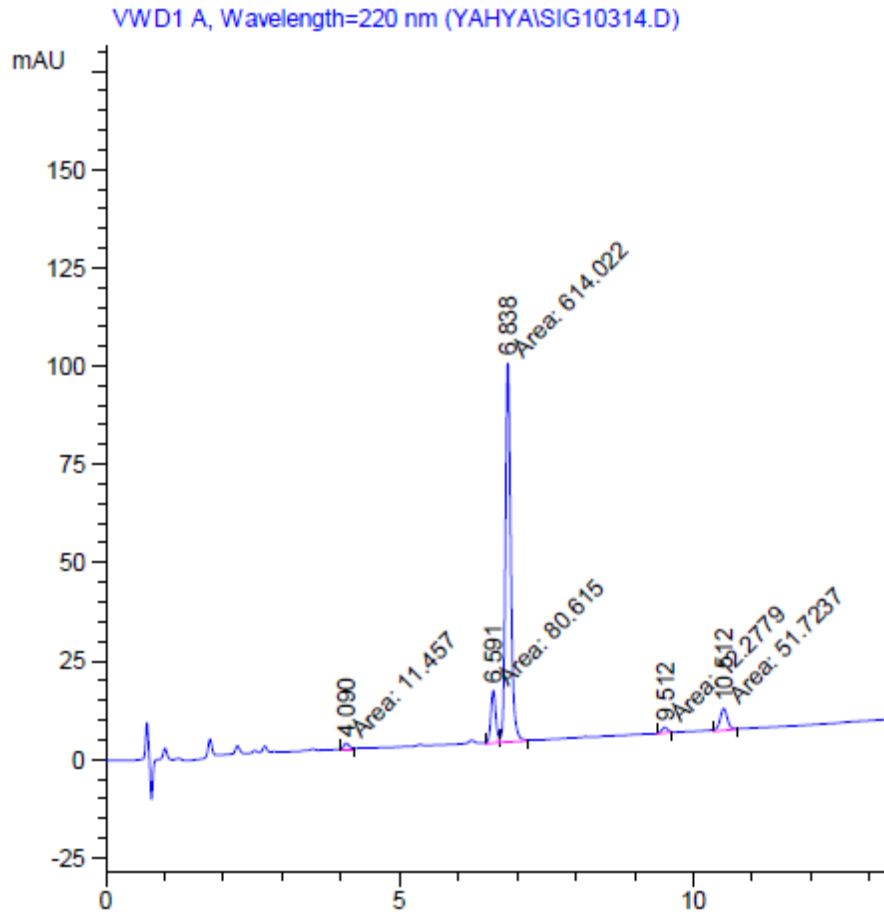

| Peak #   | RetTime [min] | Type | Width [min] | Area mAU *s | Height [mAU] | Area %  |
|----------|---------------|------|-------------|-------------|--------------|---------|
| 1        | 4.090         | MM   | 0.1207      | 11.45700    | 1.58226      | 1.4877  |
| 2        | 6.591         | MF   | 0.0996      | 80.61497    | 13.49381     | 10.4682 |
| 3        | 6.838         | FM   | 0.1058      | 614.02222   | 96.72003     | 79.7332 |
| 4        | 9.512         | MM   | 0.1317      | 12.27792    | 1.55411      | 1.5943  |
| 5        | 10.512        | MM   | 0.1524      | 51.72368    | 5.65723      | 6.7165  |
| Totals : |               |      |             | 770.09578   | 119.00743    |         |

7.7-Oxyrna-B (7 min preactivation)

VWD1 A, Wavelength=220 nm (YAHYASIG10257.D)

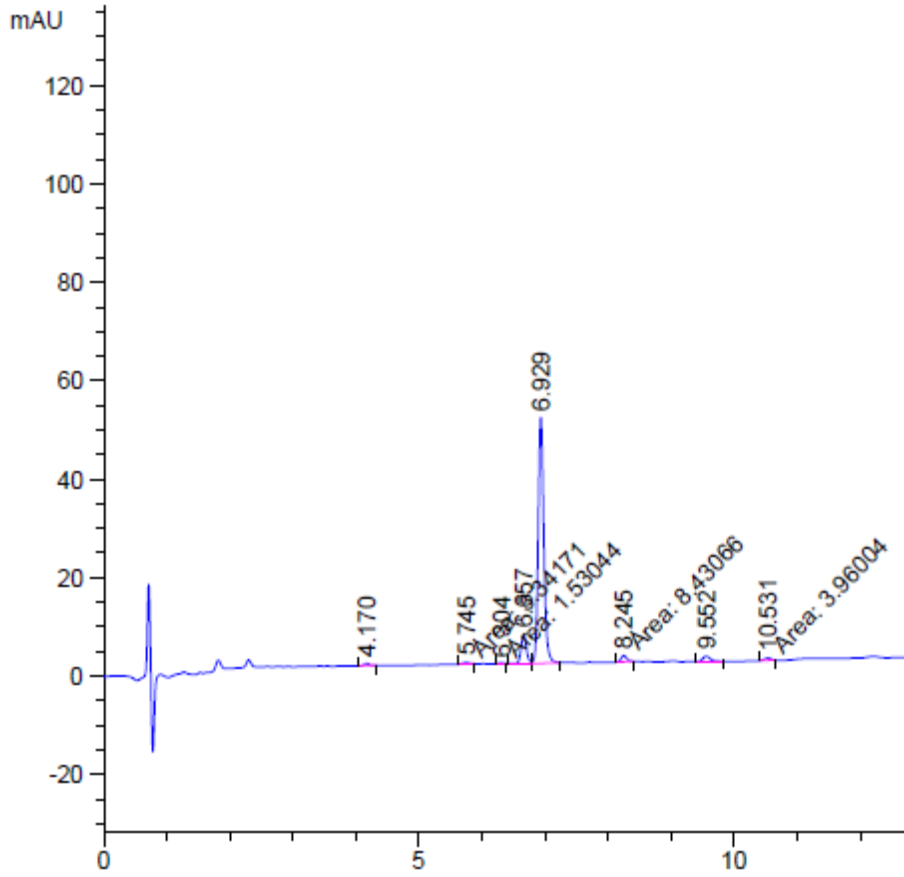

| Peak # | RetTime [min] | Type | Width [min] | Area mAU  | Area *s | Height [mAU] | Area %  |
|--------|---------------|------|-------------|-----------|---------|--------------|---------|
| 1      | 4.170         | BP   | 0.0901      | 2.66901   |         | 4.66390e-1   | 0.7117  |
| 2      | 5.745         | MM   | 0.1446      | 3.34171   |         | 3.85115e-1   | 0.8911  |
| 3      | 6.304         | MM   | 0.1026      | 1.53044   |         | 2.48714e-1   | 0.4081  |
| 4      | 6.657         | VV   | 0.0935      | 35.35608  |         | 5.87515      | 9.4282  |
| 5      | 6.929         | VB   | 0.0958      | 310.49469 |         | 49.93639     | 82.7980 |
| 6      | 8.245         | MM   | 0.1076      | 8.43066   |         | 1.30571      | 2.2482  |
| 7      | 9.552         | PB   | 0.1312      | 9.21984   |         | 1.08481      | 2.4586  |
| 8      | 10.531        | MM   | 0.1311      | 3.96004   |         | 5.03600e-1   | 1.0560  |

Totals : 375.00246 59.80588
